# Supplementary material for: Coupling compositional data analysis (CoDA) with hierarchical cluster analysis (HCA) for preliminary understanding of the dynamics of a complex water distribution system: the Naples (South Italy) case study
Source: Royal Society of Chemistry journal article supplement (doi:10.1039/d0ew01123a), 2021-01-01
Supplement: d0ew01123a1.pdf [file d0ew01123a1.pdf]

## Supplementary materials of

### **Coupling compositional data analysis (CoDA) with hierarchical cluster analysis (HCA) for preliminary understanding of the dynamics of a complex water distribution system: the Naples (south Italy) case study**

Pooria Ebrahimi<sup>a</sup>, Stefano Albanese<sup>a\*</sup>, Leopoldo Esposito<sup>b</sup>, Daniela Zuzolo<sup>c</sup>, Domenico Cicchella<sup>c</sup>

<sup>a</sup> Department of Earth, Environmental and Resources Sciences, University of Naples Federico II, Napoli 80126, Italy

<sup>b</sup> Acqua Bene Comune Napoli Azienda Speciale, Napoli 80147, Italy

<sup>c</sup> Department of Science and Technology, University of Sannio, Benevento 82100, Italy

\*Corresponding author: stefano.albanese@unina.it

**Table S1** Coordinates and address of the stations for regular tap water sampling in Naples.

**Table S2** Composition of the input water in the water distribution system of Naples in 2017.

**Fig. S1** Distribution of the measured EC,  $\text{NO}_3^-$  and pH values in the input waters for each season of 2017. The numbers above boxplots show the number of measurements in the corresponding seasons. (a-c) I1: ACO; (d-f) I2: AIR wells; (g-i) I3: Canello well field; (j-l) I4: Campano Aqueduct and Ponte Tavano wells; (m-o) I5: Serino Aqueduct.

**Fig. S2** Seasonal compositions of the input waters in the water distribution system of Naples in 2017: (a) I1: ACO; (b) I2: AIR wells; (c) I3: Canello well field; (d) I4: Campano Aqueduct and Ponte Tavano wells; and (e) I5: Serino Aqueduct.

**Fig. S3** Seasonal composition of the tap waters originated from: (a) R1: Capodimonte; (b) R2: S. Sebastiano; (c) R3: Scudillo; (d) R4: S. Giacomo; (e) R5: Pianura; (f) R6: Cangiani; (g) R7: Camaldoli; (h) S1: ACO; (i) S2: Canello well field, Campano Aqueduct and Ponte Tavano wells; and (j) S3: Serino Aqueduct.

**Fig. S4** Variation of (a) As, (b) Ni, (c) V, (d) Fe, (e) Mn, (f) Al, (g)  $\text{ClO}_2^-$ , (h)  $\text{Cl}_2$ , (i)  $\text{Na}^+$ , (j)  $\text{K}^+$ , (k)  $\text{Ca}^{2+}$ , (l)  $\text{Mg}^{2+}$ , (m)  $\text{HCO}_3^-$ , (n)  $\text{Cl}^-$ , (o)  $\text{SO}_4^{2-}$ , (p)  $\text{NO}_3^-$ , (q)  $\text{F}^-$ , (r) EC, (s) turbidity, (t) pH and (u) temperature in the collected tap water samples. The gray circles indicate the monthly measurements and the black squares show the annual average values. The black dashed lines represents drinking water action limits (See Tables 2 and S1). R1: Capodimonte; R2: S. Sebastiano; R3: Scudillo; R4: S. Giacomo; R5: Pianura; R6: Cangiani; R7: Camaldoli; S1: ACO; S2: Canello well field, Campano Aqueduct and Ponte Tavano wells; S3: Serino Aqueduct; and UN: Not defined in the water supply scheme.

**Fig. S5** Spatial representation of the results of seasonal hierarchical cluster analysis: (a) winter; (b) spring; (c) summer; and (d) fall. R1: Capodimonte; R2: S. Sebastiano; R3: Scudillo; S1: ACO; and S3: Serino Aqueduct.

**Fig. S6** The tap water composition before and after (without and with asterisk, respectively) implementing the HCA result: (a) R1: Capodimonte; (b) R3: Scudillo; (c) S2: Canello well field, Campano Aqueduct and Ponte Tavano wells, I3: Canello well field, I4: Campano Aqueduct and Ponte Tavano wells, and I5: Serino Aqueduct; and (d) S3: Serino Aqueduct.

**Text S1** HCA performance

**Table S1** Coordinates and address of the stations for regular tap water sampling in Naples.

| Station | Latitude | Longitude | Address                                              |
|---------|----------|-----------|------------------------------------------------------|
| D1      | 40.83293 | 14.22750  | Riviera di Chiaia                                    |
| D2      | 40.83725 | 14.23346  | Piazza Amedeo                                        |
| D3      | 40.80584 | 14.20356  | Via Posillipo                                        |
| D4      | 40.83105 | 14.21260  | Via Manzoni                                          |
| D5      | 40.82864 | 14.24821  | Piazzetta Marinari                                   |
| D6      | 40.83786 | 14.24191  | Piazza Mondragone                                    |
| D7      | 40.82834 | 14.19706  | Via Benedetto Cariteo                                |
| D8      | 40.81558 | 14.18782  | Via Cavallegeri d'Aosta                              |
| D9      | 40.81598 | 14.16891  | Via S. Ferrara                                       |
| D10     | 40.81671 | 14.16007  | Via di Pozzuoli                                      |
| D11     | 40.84262 | 14.19819  | Via Adriano                                          |
| D12     | 40.84828 | 14.19665  | Via Scherillo                                        |
| D13     | 40.85508 | 14.18035  | Via Padula                                           |
| D14     | 40.86217 | 14.17434  | Corso Duca d'Aosta                                   |
| D15     | 40.84716 | 14.22119  | Via Caldieri                                         |
| D16     | 40.85015 | 14.22429  | Via Simone Martini                                   |
| D17     | 40.84272 | 14.22162  | Via Santa Maria Della Libera                         |
| D18     | 40.86547 | 14.22863  | Via del Serbatoio                                    |
| D19     | 40.84402 | 14.23613  | Via Ligorio Pirro                                    |
| D20     | 40.88852 | 14.24409  | Via V. Veneto                                        |
| D21     | 40.88952 | 14.22445  | Via E. Scaglione                                     |
| D22     | 40.89018 | 14.21661  | Corso Chiaiano                                       |
| D23     | 40.86793 | 14.21358  | Via L. Bianchi                                       |
| D24     | 40.86862 | 14.19166  | Via Guantai ad Orsolona                              |
| D25     | 40.90044 | 14.24549  | Via A. Ghisleri                                      |
| D26     | 40.86703 | 14.26864  | Via Arenaccia                                        |
| D27     | 40.86916 | 14.25448  | Via Ponti Rossi                                      |
| D28     | 40.87105 | 14.24460  | Viale Colli Aminei                                   |
| D29     | 40.86182 | 14.24565  | Vicoletto S. Vincenzo alla Sanità                    |
| D30     | 40.85501 | 14.25383  | Piazza Cavour                                        |
| D31     | 40.89304 | 14.25370  | Via Lombardia                                        |
| D32     | 40.88509 | 14.23899  | Via G. Manfredi ang. Via Lieti a Capodimonte         |
| D33     | 40.87699 | 14.27734  | Varco ingresso dogana Aeroporto - Viale U. Maddalena |
| D34     | 40.89060 | 14.28059  | Via G. Pascale                                       |
| D35     | 40.87987 | 14.30715  | Via Icaro                                            |
| D36     | 40.84251 | 14.24419  | Corso V. Emanuele                                    |
| D37     | 40.84932 | 14.24976  | Piazza Dante                                         |
| D38     | 40.85388 | 14.24652  | Via S. Rosa                                          |
| D39     | 40.85024 | 14.26379  | Piazza Calenda                                       |
| D40     | 40.84766 | 14.26880  | Corso Garibaldi                                      |
| D41     | 40.84137 | 14.25368  | Via Flavio Gioia                                     |
| D42     | 40.84685 | 14.25189  | Piazza del Gesu                                      |
| D43     | 40.82874 | 14.31460  | Via Bernardino Martirano                             |
| D44     | 40.86975 | 14.33157  | Via Madonnelle                                       |
| D45     | 40.85177 | 14.33326  | C.so Ponticelli                                      |
| D46     | 40.84571 | 14.33017  | Via Mastellone                                       |
| D47     | 40.84610 | 14.31420  | Via Volpicella                                       |
| D48     | 40.85672 | 14.26142  | Via C. Rosaroll                                      |
| D49     | 40.85710 | 14.27124  | C.ta Ponte di Casanova                               |
| D51     | 40.84670 | 14.28033  | Via Brin                                             |
| D52     | 40.86529 | 14.29121  | Largo Tarantini                                      |

**Table S2** Composition of the input water in the water distribution system of Naples in 2017.

| Input           | Seasonal/<br>Annual | Ca <sup>2+</sup> | Mg <sup>2+</sup> | Na <sup>+</sup> | SO <sub>4</sub> <sup>2-</sup> | Cl <sup>-</sup> | F <sup>-</sup> | NO <sub>3</sub> <sup>-</sup> | EC     | pH  |
|-----------------|---------------------|------------------|------------------|-----------------|-------------------------------|-----------------|----------------|------------------------------|--------|-----|
|                 |                     | mg/l             | mg/l             | mg/l            | mg/l                          | mg/l            | mg/l           | mg/l                         | μS/cm  | -   |
| I1 <sup>a</sup> | Winter              | 121.6            | 28.6             | 8.0             | 15.0                          | 11.0            | 0.2            | 3.9                          | 724.3  | 7.1 |
|                 | Spring              | 124.3            | 31.0             | 10.0            | 18.0                          | 16.0            | 0.2            | 4.2                          | 722.9  | 7.2 |
|                 | Summer              | 116.8            | 28.5             | 8.0             | 18.0                          | 12.0            | 0.2            | 4.1                          | 736.2  | 7.2 |
|                 | Fall                | 123.8            | 30.2             | 8.0             | 22.0                          | 13.0            | 0.2            | 3.8                          | 726.6  | 7.1 |
|                 | Annual              | 121.6            | 29.6             | 8.5             | 18.3                          | 13.0            | 0.2            | 4.0                          | 727.5  | 7.2 |
| I2 <sup>b</sup> | Winter              | 131.8            | 27.0             | -               | -                             | 86.9            | 1.8            | 106.3                        | 1172.0 | 7.2 |
|                 | Spring              | 136.8            | 28.1             | 80.0            | 168.0                         | 89.2            | 1.7            | 111.1                        | 1165.8 | 7.3 |
|                 | Summer              | 159.8            | 32.0             | -               | -                             | 124.9           | 1.5            | 84.6                         | 1265.1 | 7.1 |
|                 | Fall                | 153.8            | 33.5             | 84.0            | 152.0                         | 105.1           | 2.0            | 104.8                        | 1170.2 | 7.2 |
|                 | Annual              | 145.3            | 30.2             | 82.0            | 160.0                         | 102.0           | 1.8            | 101.8                        | 1193.2 | 7.2 |
| I3 <sup>c</sup> | Winter              | 165.2            | 40.4             | 87.0            | 46.0                          | 172.0           | 0.6            | 9.5                          | 1410.7 | 6.9 |
|                 | Spring              | 185.2            | 49.4             | 97.0            | 52.0                          | 197.0           | 0.6            | 9.1                          | 1419.9 | 7.0 |
|                 | Summer              | 190.9            | 48.2             | 102.0           | 51.0                          | 201.0           | 0.4            | 9.1                          | 1489.5 | 6.9 |
|                 | Fall                | 172.9            | 43.1             | 88.0            | 43.0                          | 164.0           | 0.6            | 9.3                          | 1343.0 | 6.9 |
|                 | Annual              | 178.6            | 45.3             | 93.5            | 48.0                          | 183.5           | 0.5            | 9.2                          | 1415.7 | 6.9 |
| I4 <sup>d</sup> | Winter              | 188.0            | 51.8             | 102.0           | 59.0                          | 200.0           | 0.8            | 13.0                         | 1596.2 | 7.0 |
|                 | Spring              | -                | -                | -               | -                             | -               | -              | 13.0                         | 1607.7 | 7.0 |
|                 | Summer              | -                | -                | -               | -                             | -               | -              | 12.7                         | 1560.3 | 7.1 |
|                 | Fall                | 202.5            | 55.6             | 100.0           | 58.0                          | 217.0           | 0.7            | 13.2                         | 1615.7 | 6.9 |
|                 | Annual              | 195.3            | 53.7             | 101.0           | 58.5                          | 208.5           | 0.7            | 13.0                         | 1596.6 | 7.0 |
| I5 <sup>e</sup> | Winter              | 54.1             | 9.6              | 7.0             | 9.0                           | 9.0             | 0.2            | 4.7                          | 351.2  | 7.7 |
|                 | Spring              | -                | -                | -               | -                             | -               | -              | 4.2                          | 347.4  | 7.8 |
|                 | Summer              | 55.0             | 8.9              | 7.0             | 5.0                           | 10.0            | 0.2            | 4.0                          | 335.7  | 7.9 |
|                 | Fall                | -                | -                | -               | -                             | -               | -              | 4.2                          | 339.8  | 7.6 |
|                 | Annual              | 54.6             | 9.3              | 7.0             | 7.0                           | 9.5             | 0.2            | 4.3                          | 345.2  | 7.8 |

<sup>a</sup> ACO; <sup>b</sup> AIR wells; <sup>c</sup> Cancellò well field; <sup>d</sup> Campano Aqueduct and Ponte Tavano wells; <sup>e</sup> Serino Aqueduct. EC, NO<sub>3</sub><sup>-</sup> and pH were regularly measured (see Fig. S1 for further details). For the rest of chemicals, results of six measurements in AIR wells and one measurement in the others are available in each season.

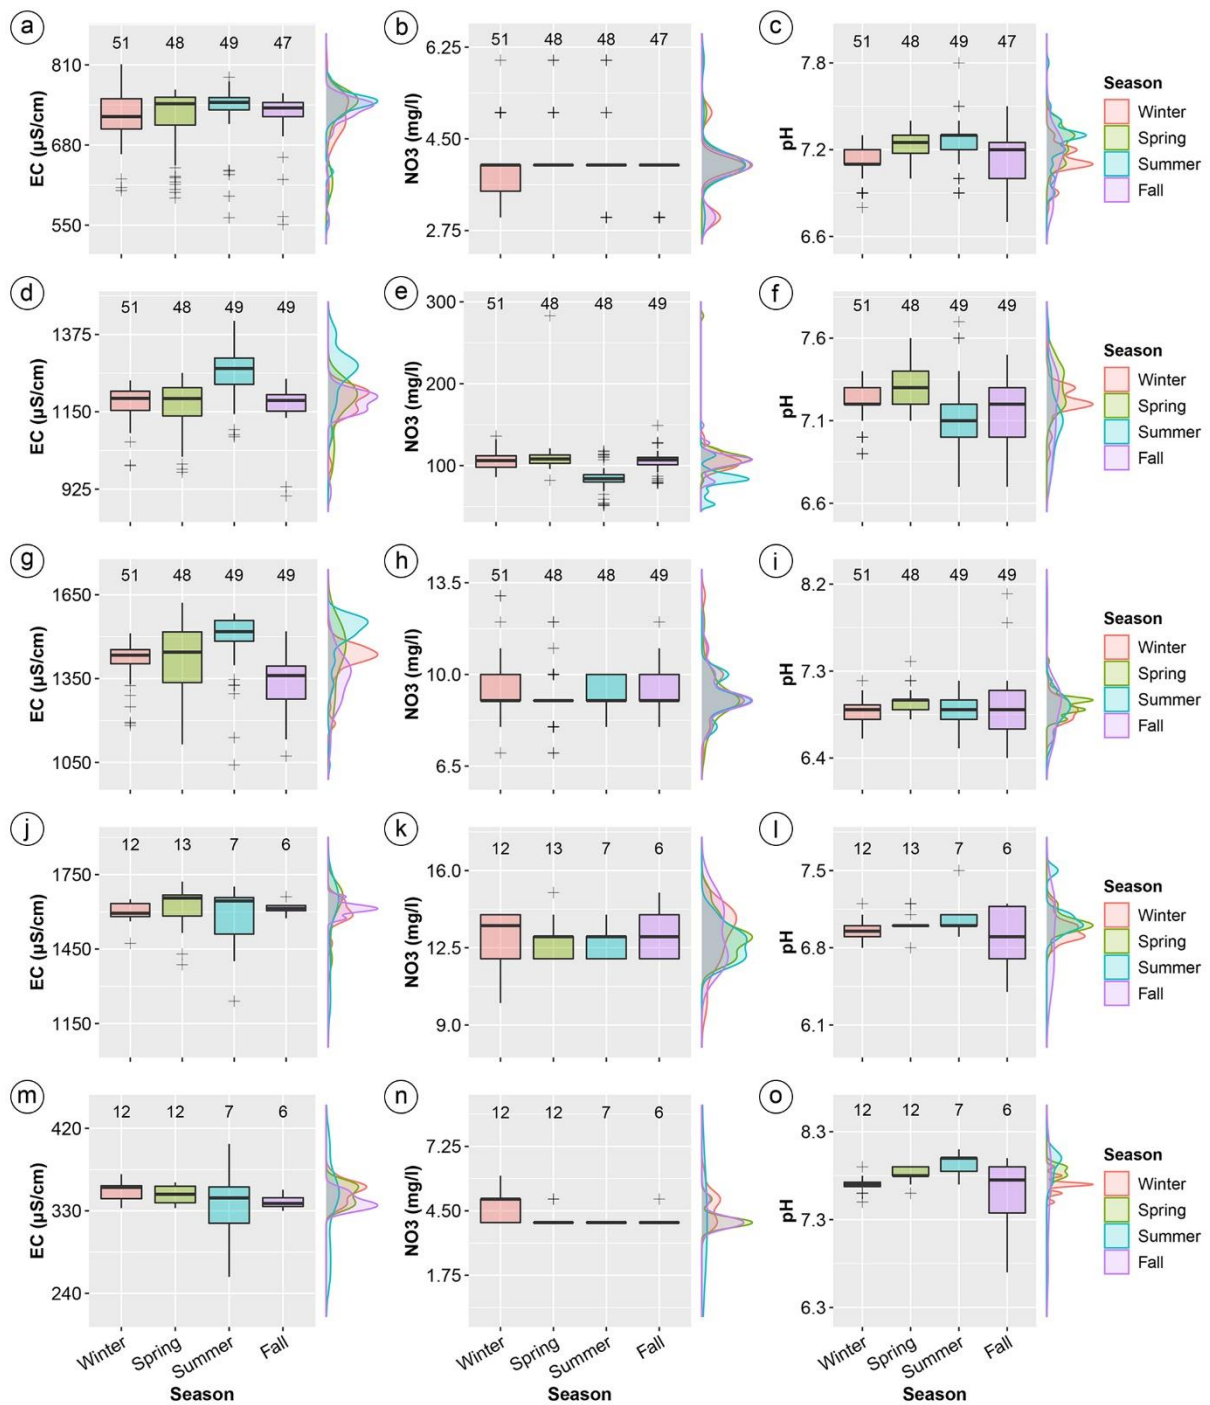

**Fig. S1** Distribution of the measured EC, NO<sub>3</sub><sup>-</sup> and pH values in the input waters for each season of 2017. The numbers above boxplots show the number of measurements in the corresponding seasons. (a-c) I1: ACO; (d-f) I2: AIR wells; (g-i) I3: Canello well field; (j-l) I4: Campano Aqueduct and Ponte Tavano wells; (m-o) I5: Serino Aqueduct.

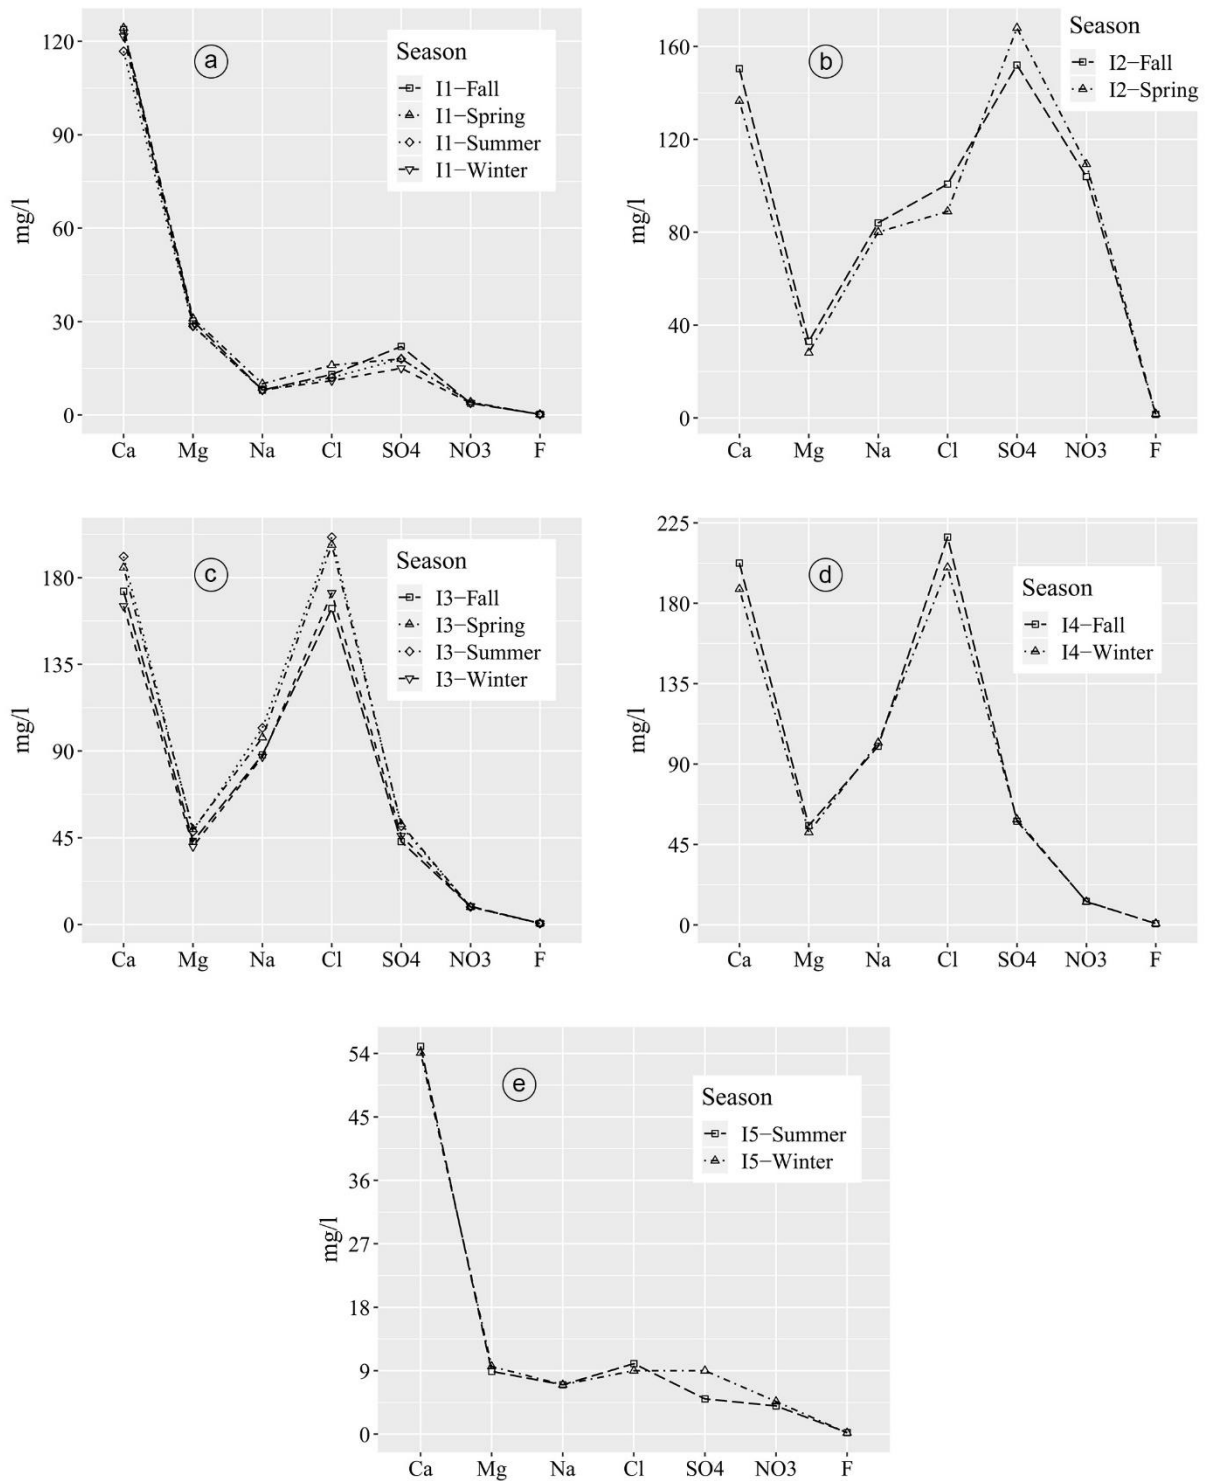

**Fig. S2** Seasonal compositions of the input waters in the water distribution system of Naples in 2017: (a) I1: ACO; (b) I2: AIR wells; (c) I3: Canello well field; (d) I4: Campano Aqueduct and Ponte Tavano wells; and (e) I5: Serino Aqueduct.

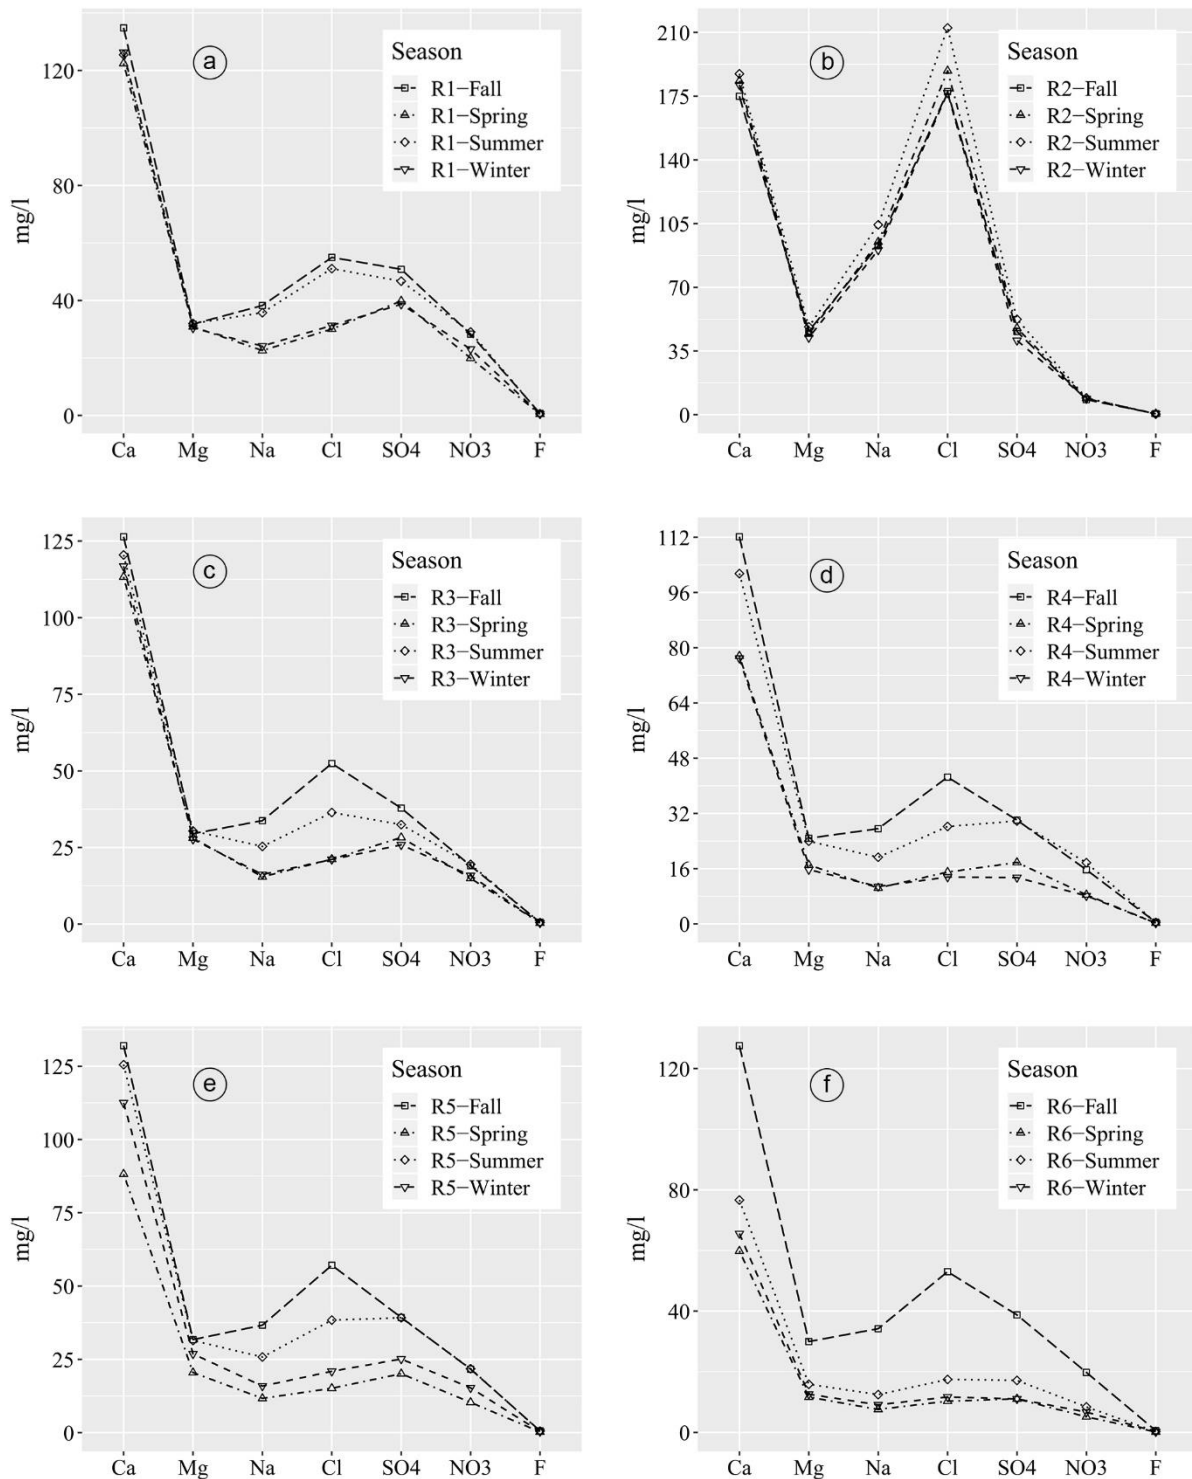

**Fig. S3** Seasonal composition of the tap waters originated from: (a) R1: Capodimonte; (b) R2: S. Sebastiano; (c) R3: Scudillo; (d) R4: S. Giacomo; (e) R5: Pianura; (f) R6: Cangiani; (g) R7: Camaldoli; (h) S1: ACO; (i) S2: Canello well field, Campano Aqueduct and Ponte Tavano wells; and (j) S3: Serino Aqueduct.

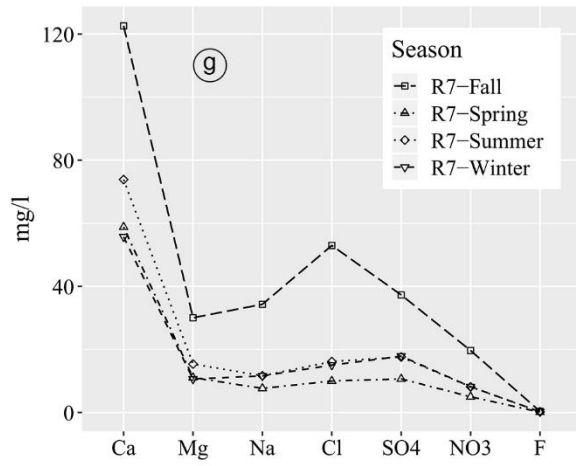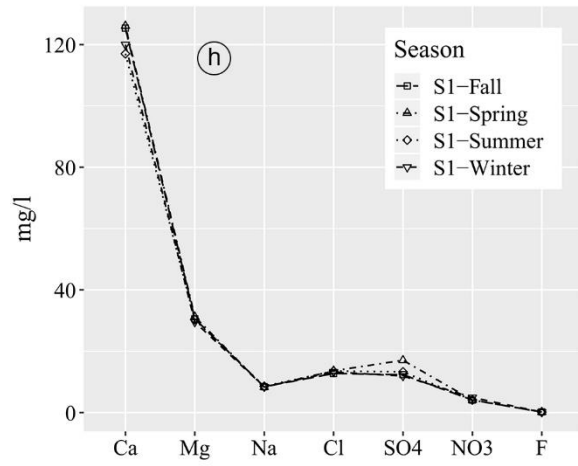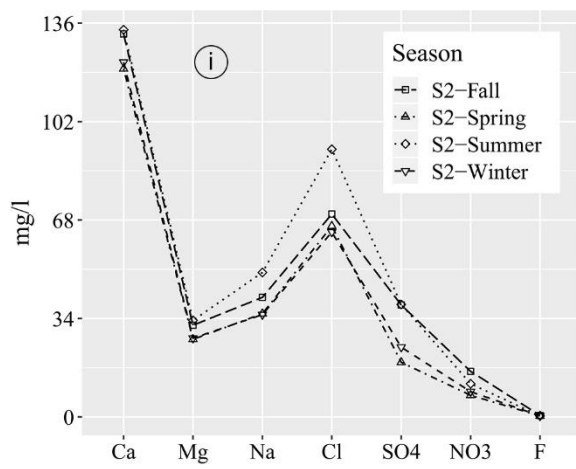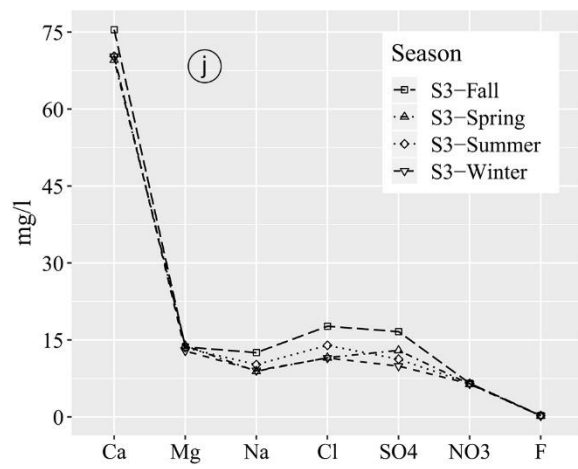

Fig. S3 (continued)

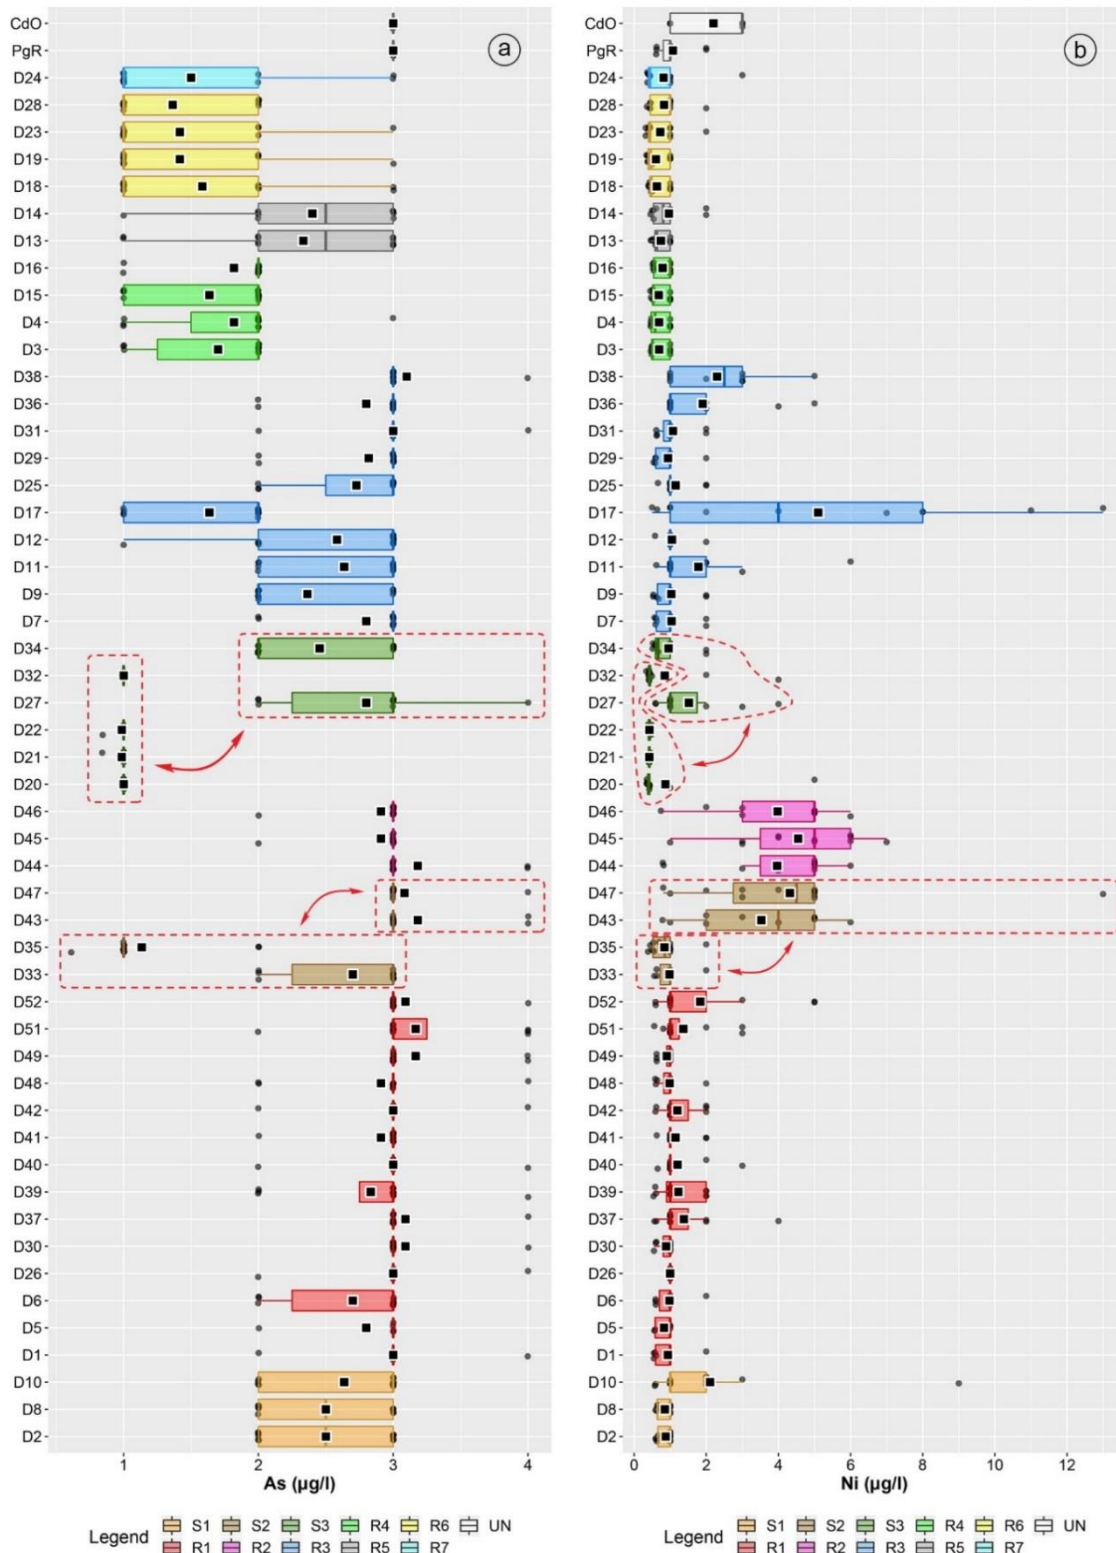

**Fig. S4** Variation of (a) As, (b) Ni, (c) V, (d) Fe, (e) Mn, (f) Al, (g)  $\text{ClO}_2^-$ , (h)  $\text{Cl}_2$ , (i)  $\text{Na}^+$ , (j)  $\text{K}^+$ , (k)  $\text{Ca}^{2+}$ , (l)  $\text{Mg}^{2+}$ , (m)  $\text{HCO}_3^-$ , (n)  $\text{Cl}^-$ , (o)  $\text{SO}_4^{2-}$ , (p)  $\text{NO}_3^-$ , (q)  $\text{F}^-$ , (r) EC, (s) turbidity, (t) pH and (u) temperature in the collected tap water samples. The gray circles indicate the monthly measurements and the black squares show the annual average values. The black dashed lines represents drinking water action limits (See Tables 2 and S1). R1: Capodimonte; R2: S. Sebastiano; R3: Scudillo; R4: S. Giacomo; R5: Pianura; R6: Cangiani; R7: Camaldoli; S1: ACO; S2: Canello well field, Campano Aqueduct and Ponte Tavano wells; S3: Serino Aqueduct; and UN: Not defined in the water supply scheme.



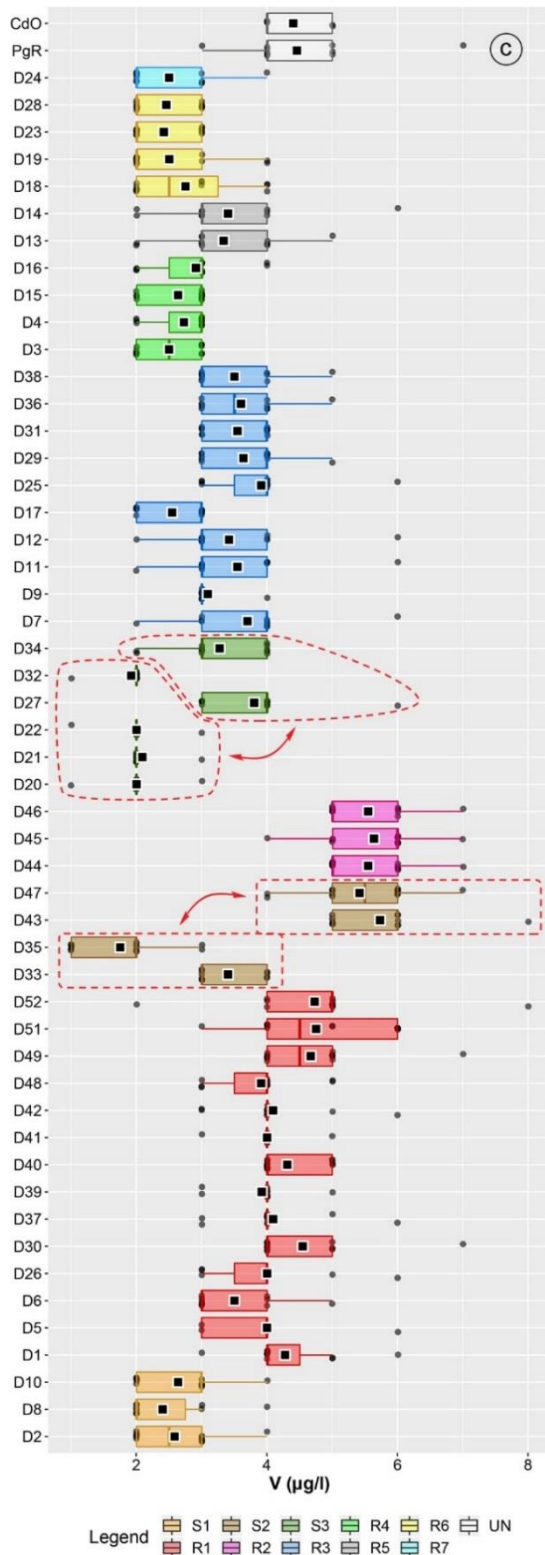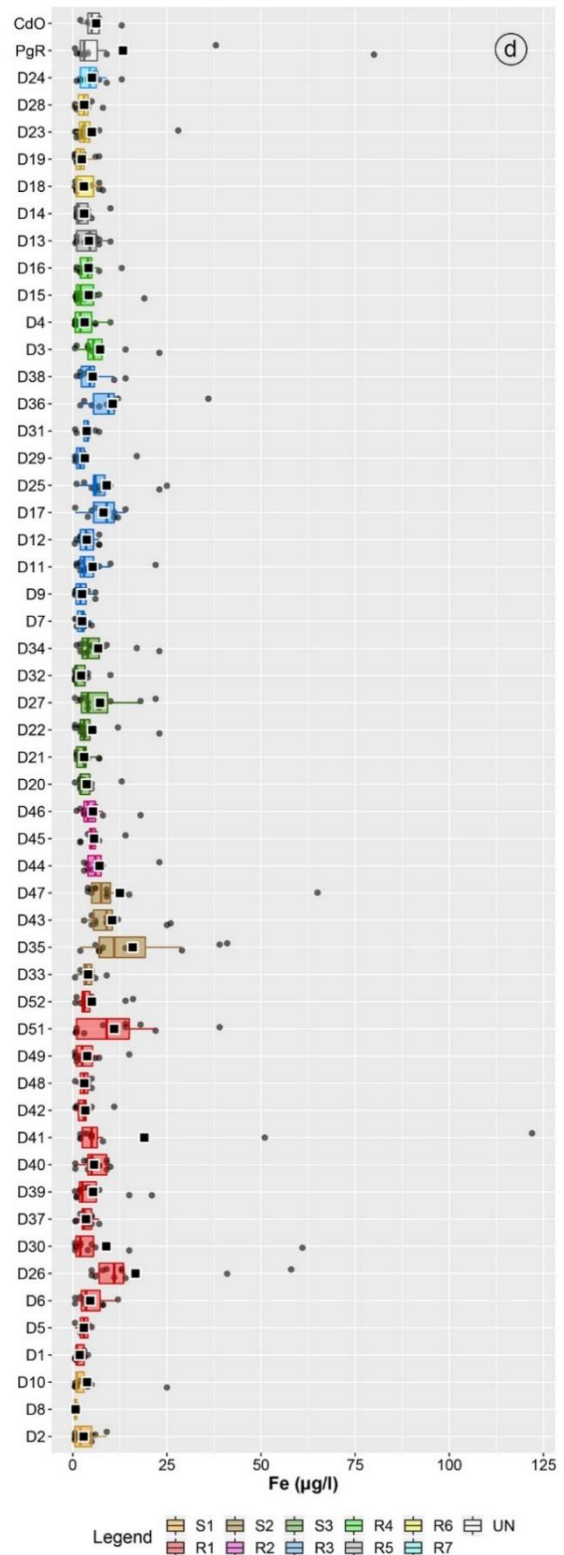

Fig. S4 (continued)

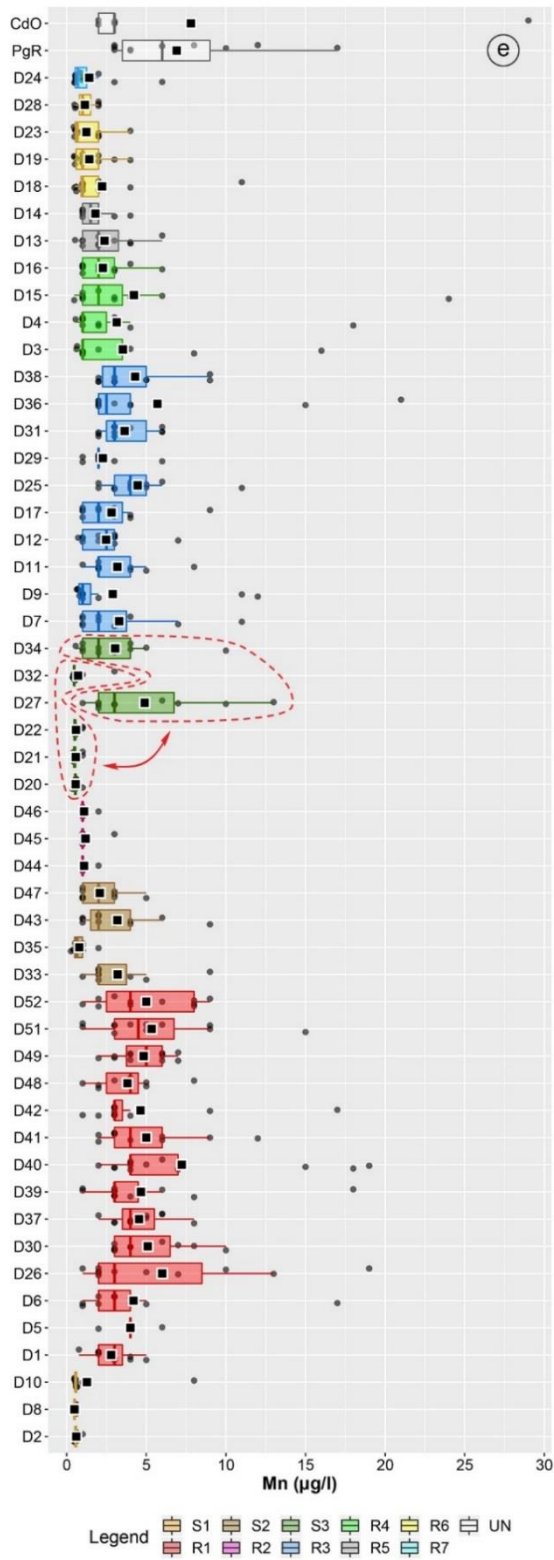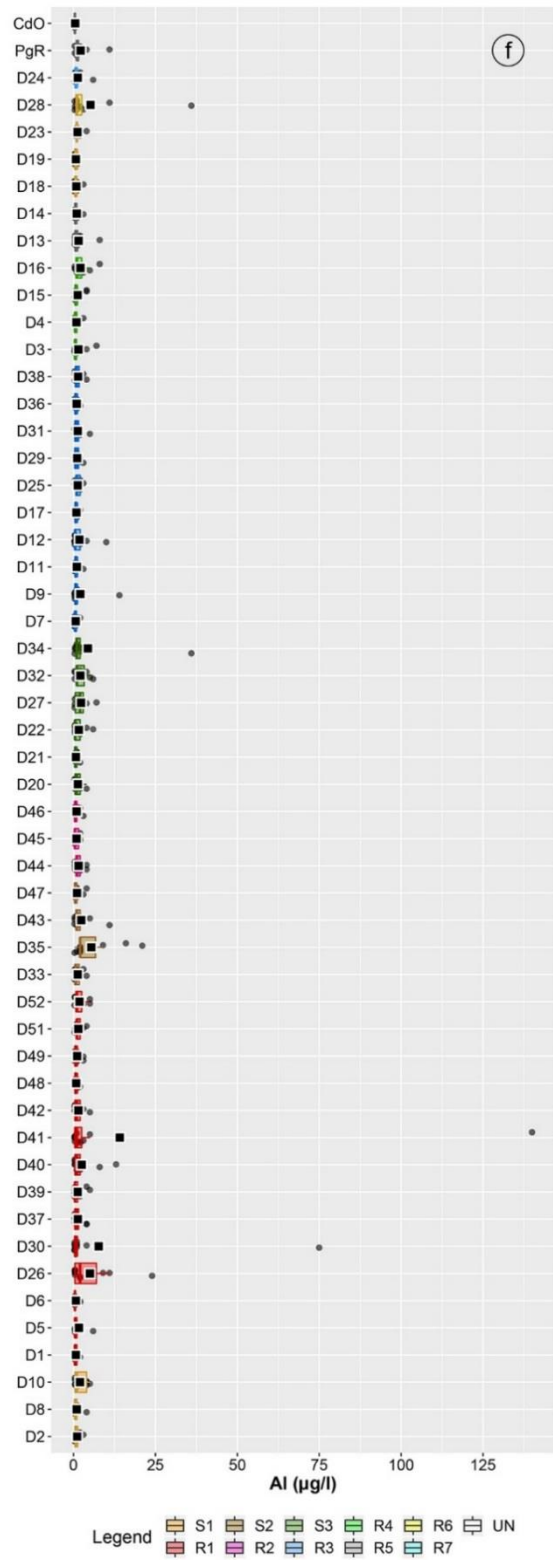

Fig. S4 (continued)

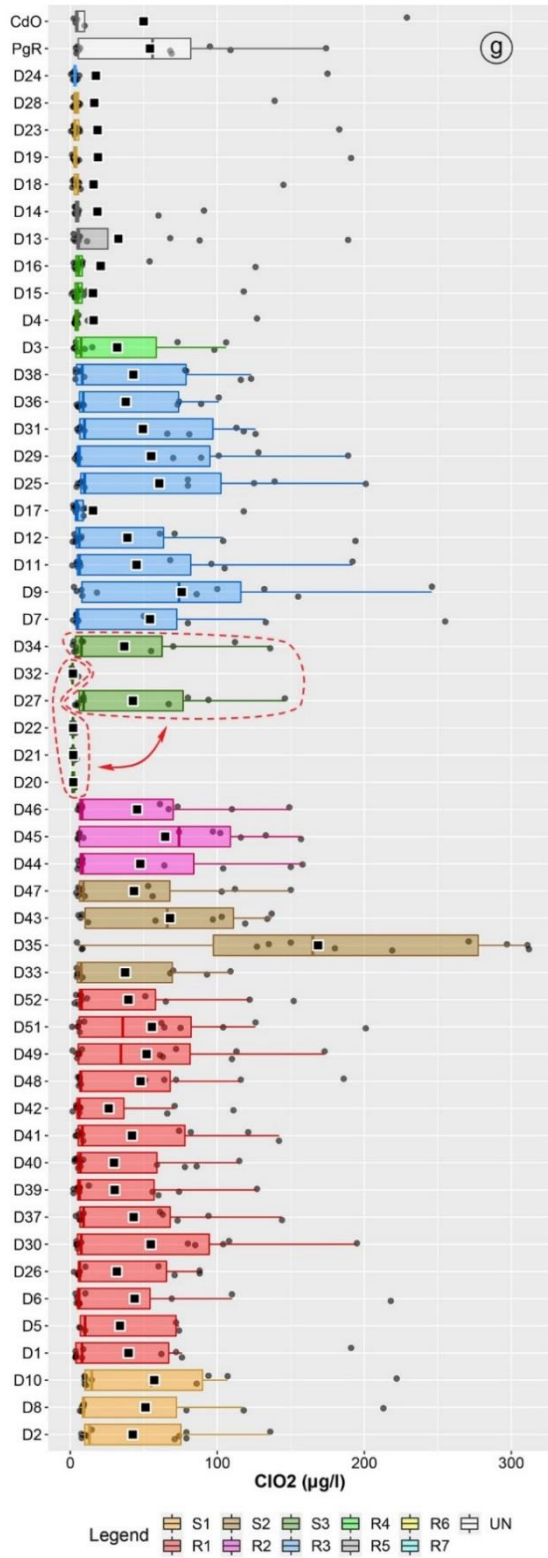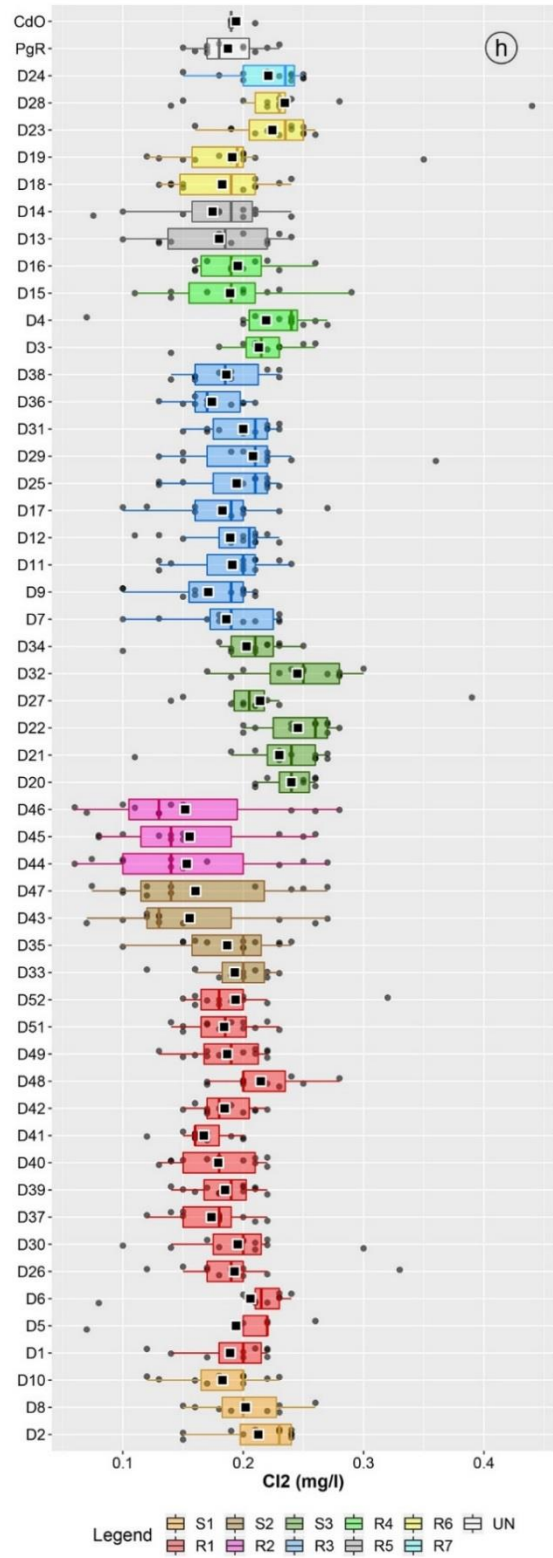

Fig. S4 (continued)

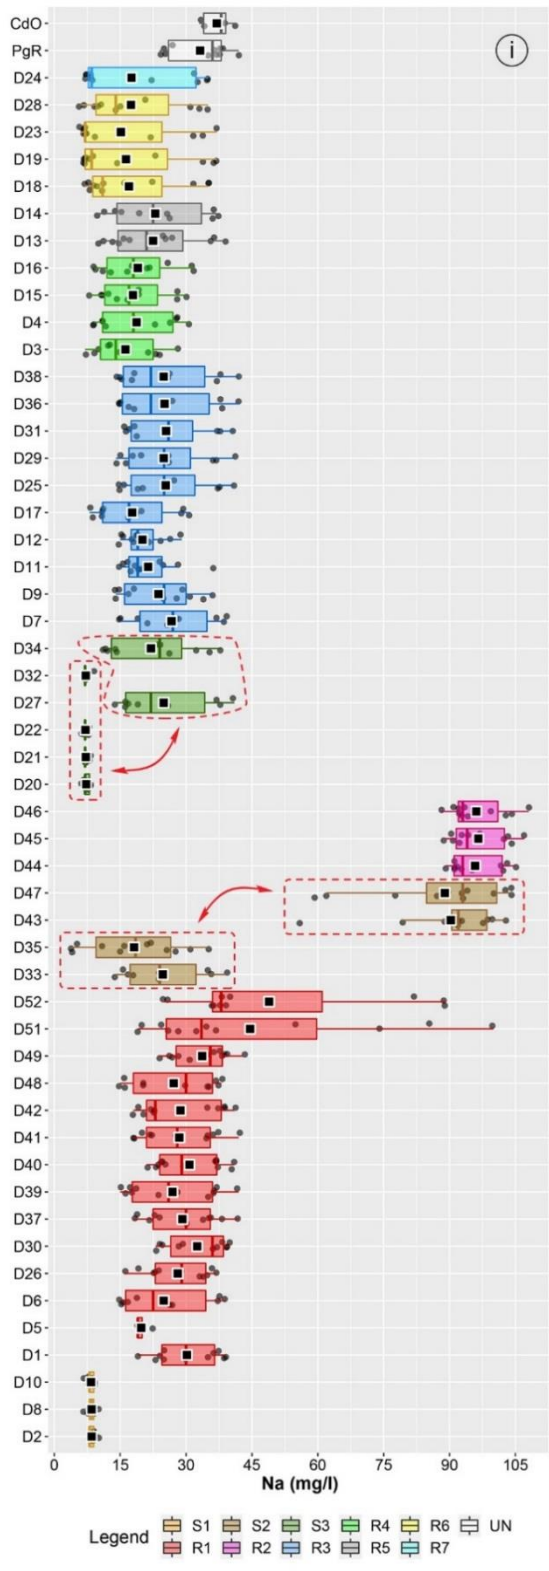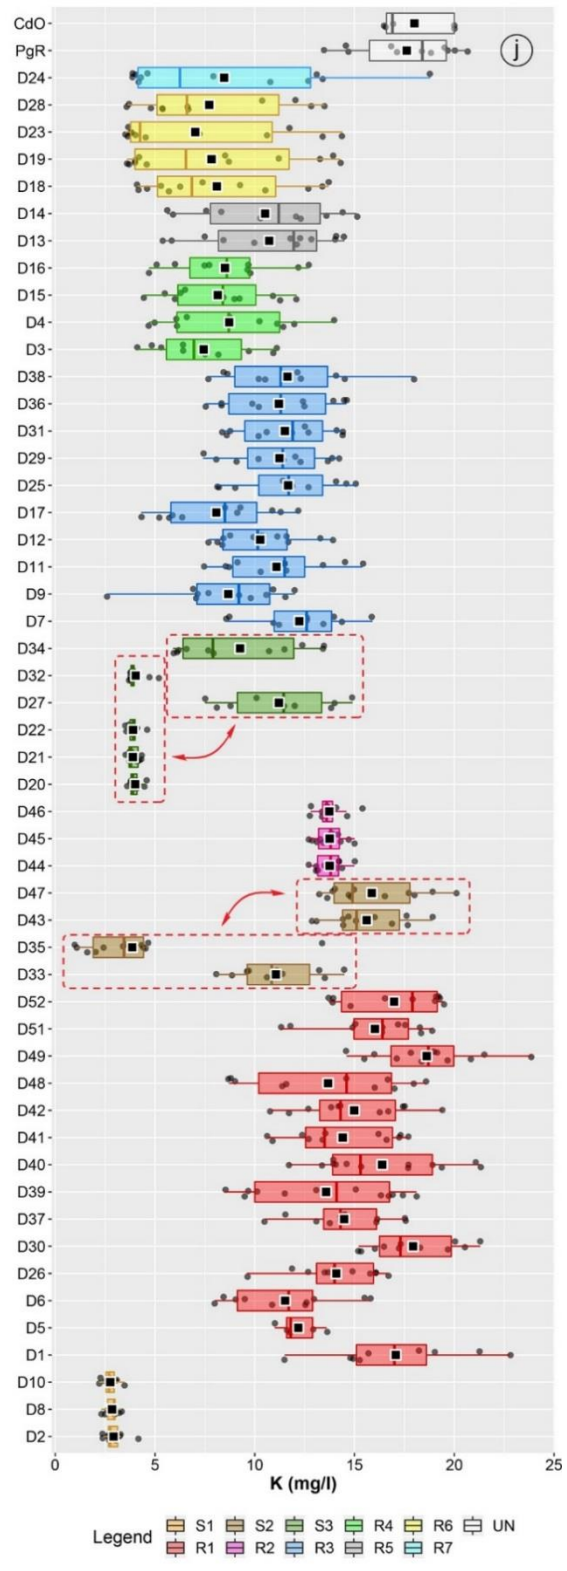

Fig. S4 (continued)

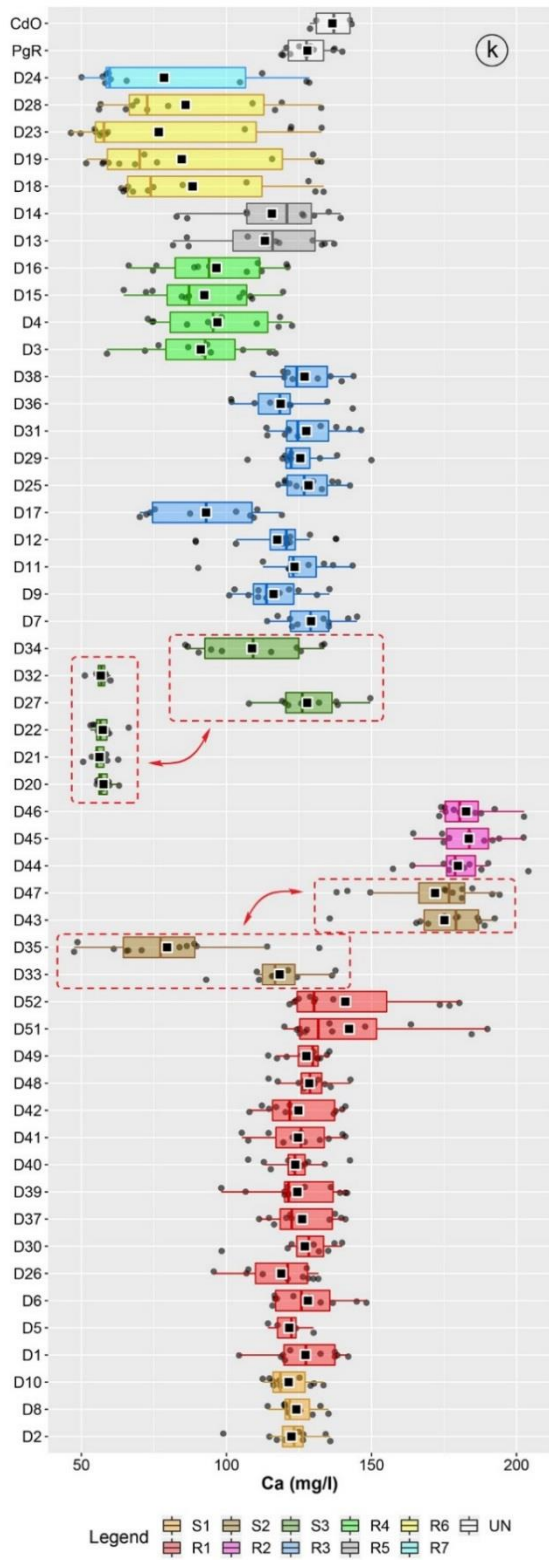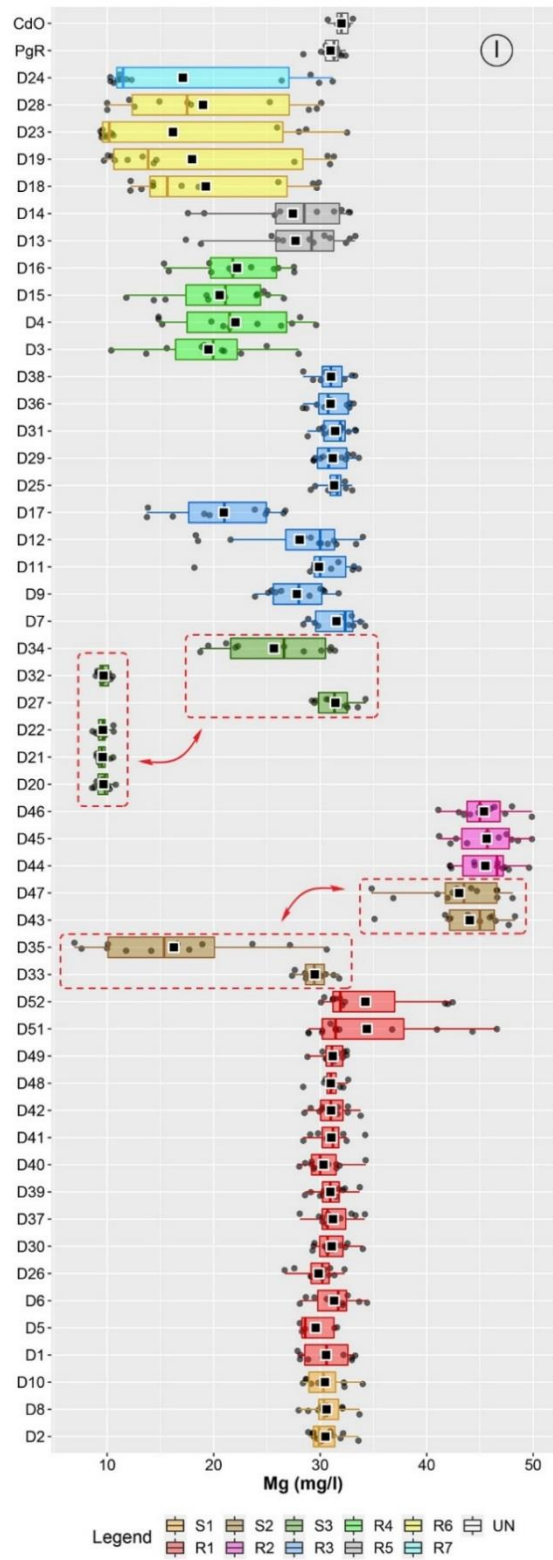

Fig. S4 (continued)

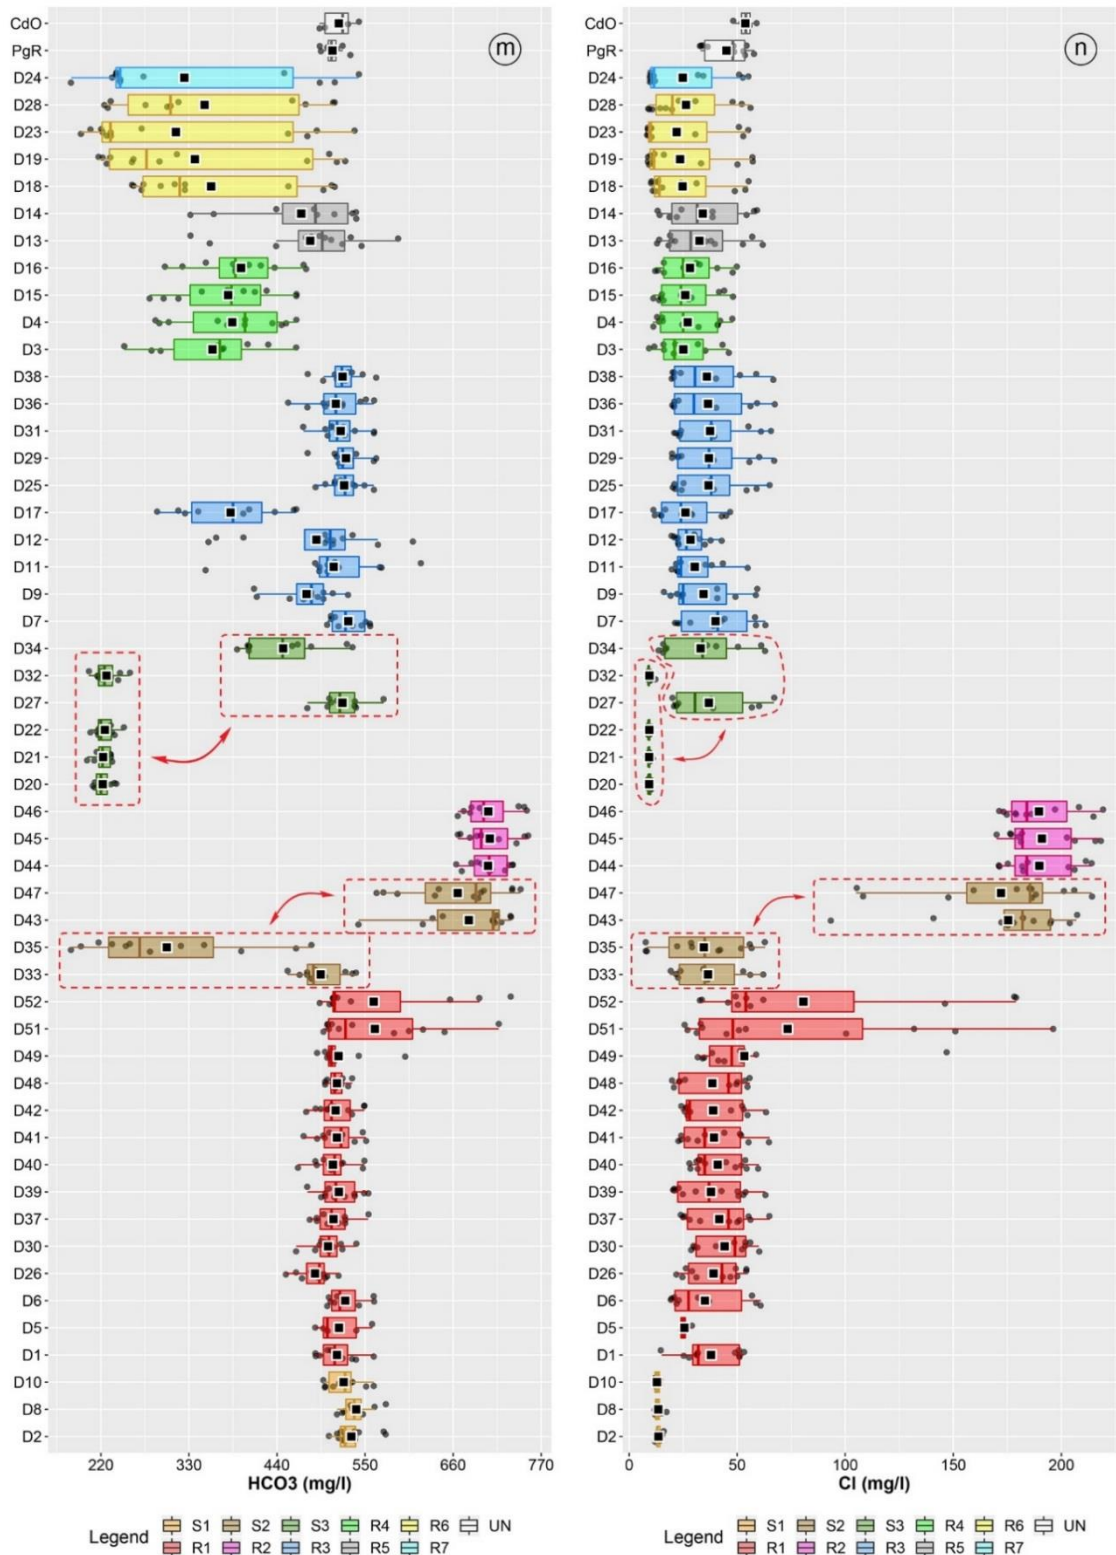

Fig. S4 (continued)

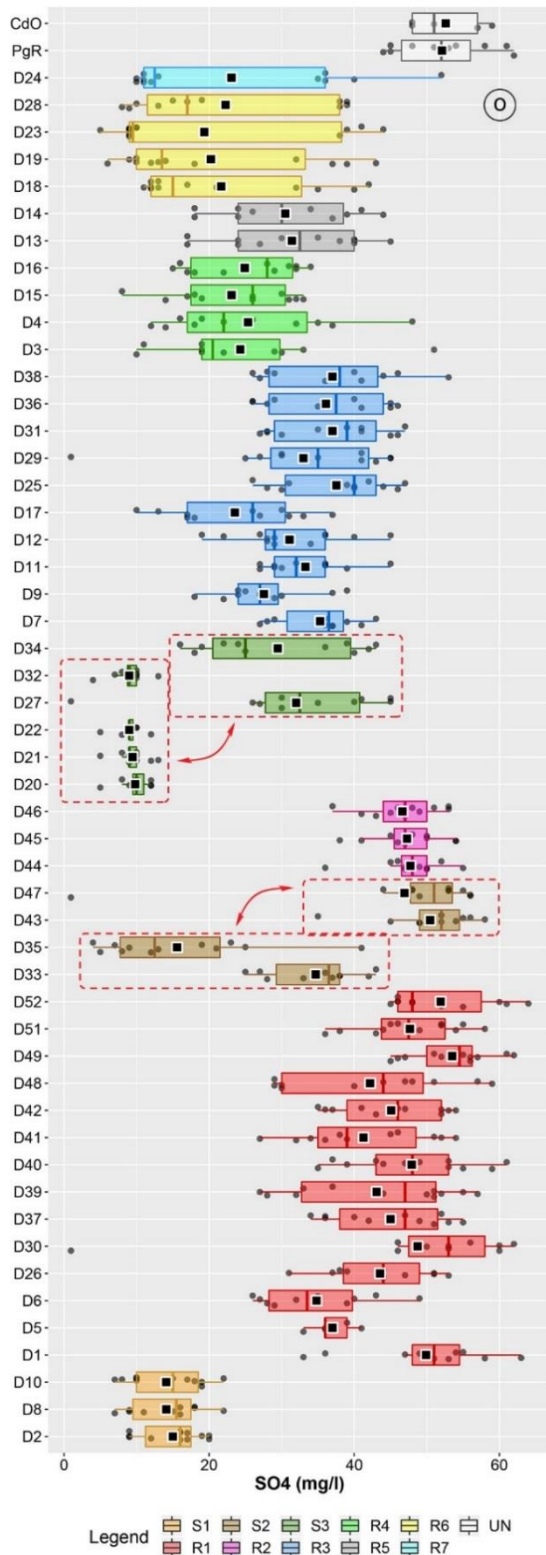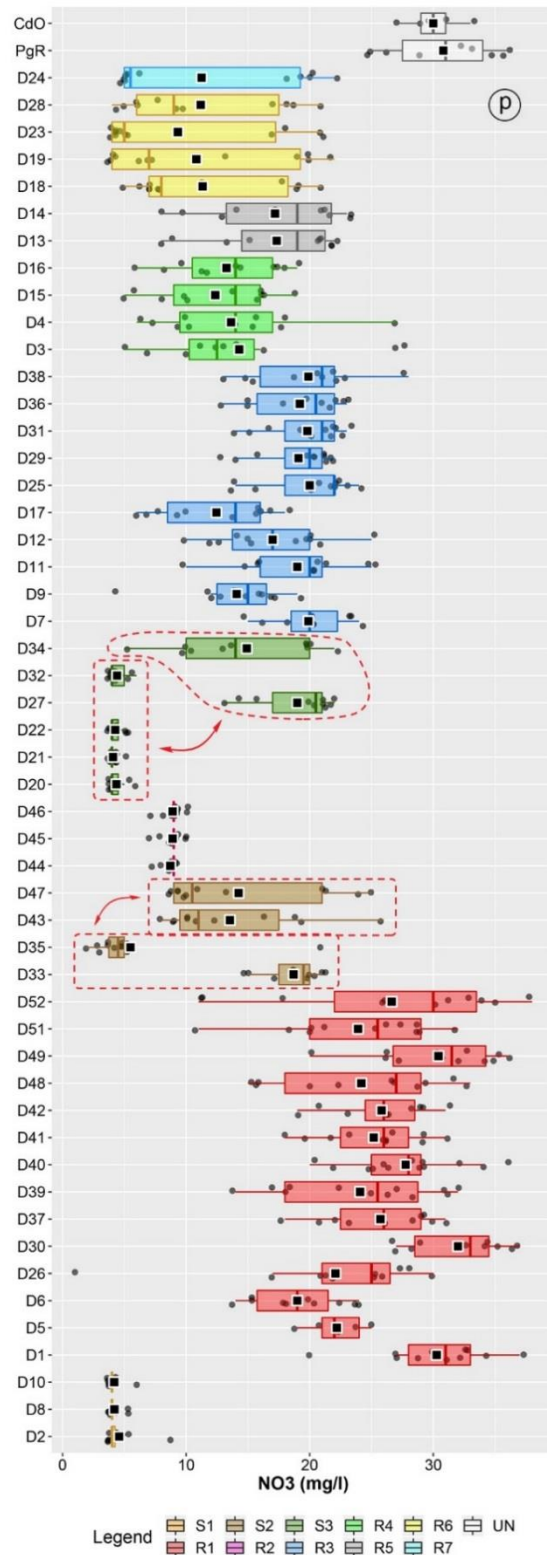

Fig. S4 (continued)

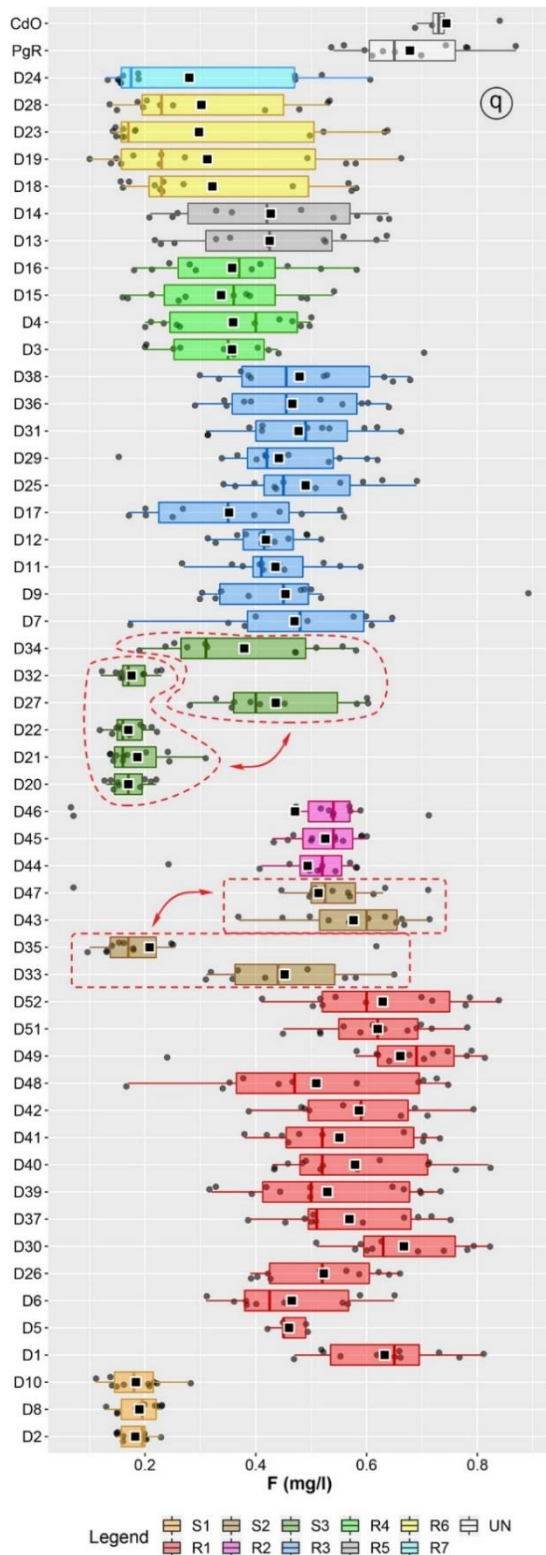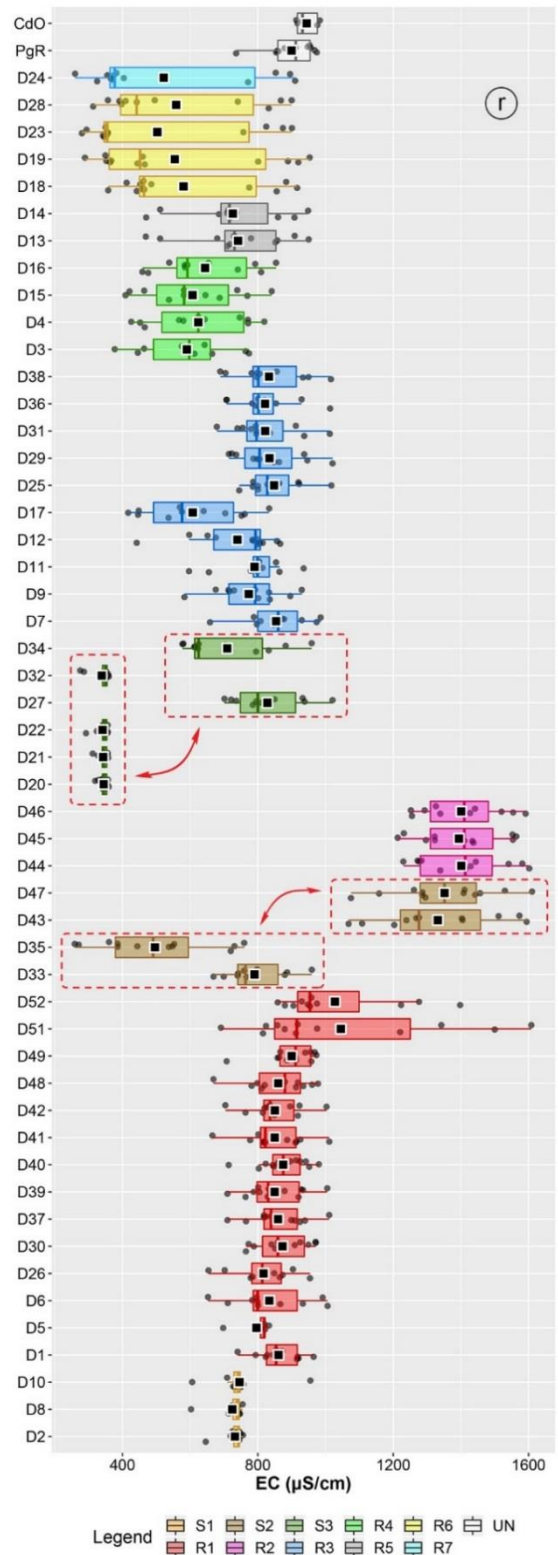

Fig. S4 (continued)



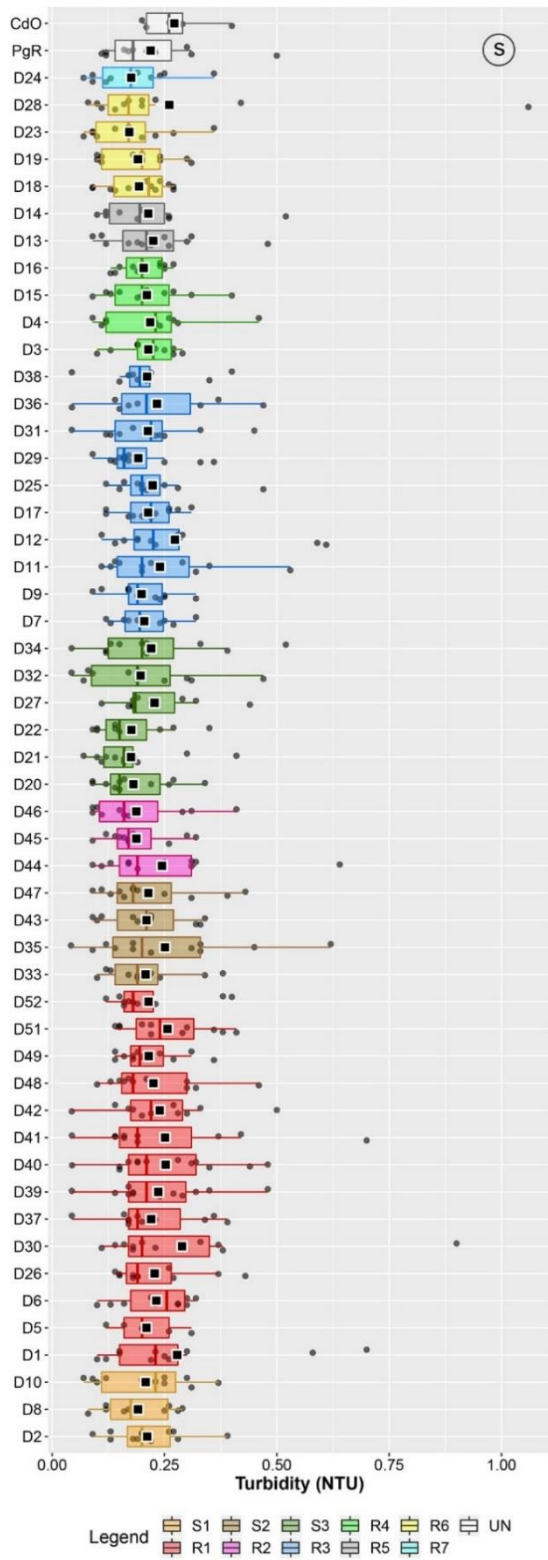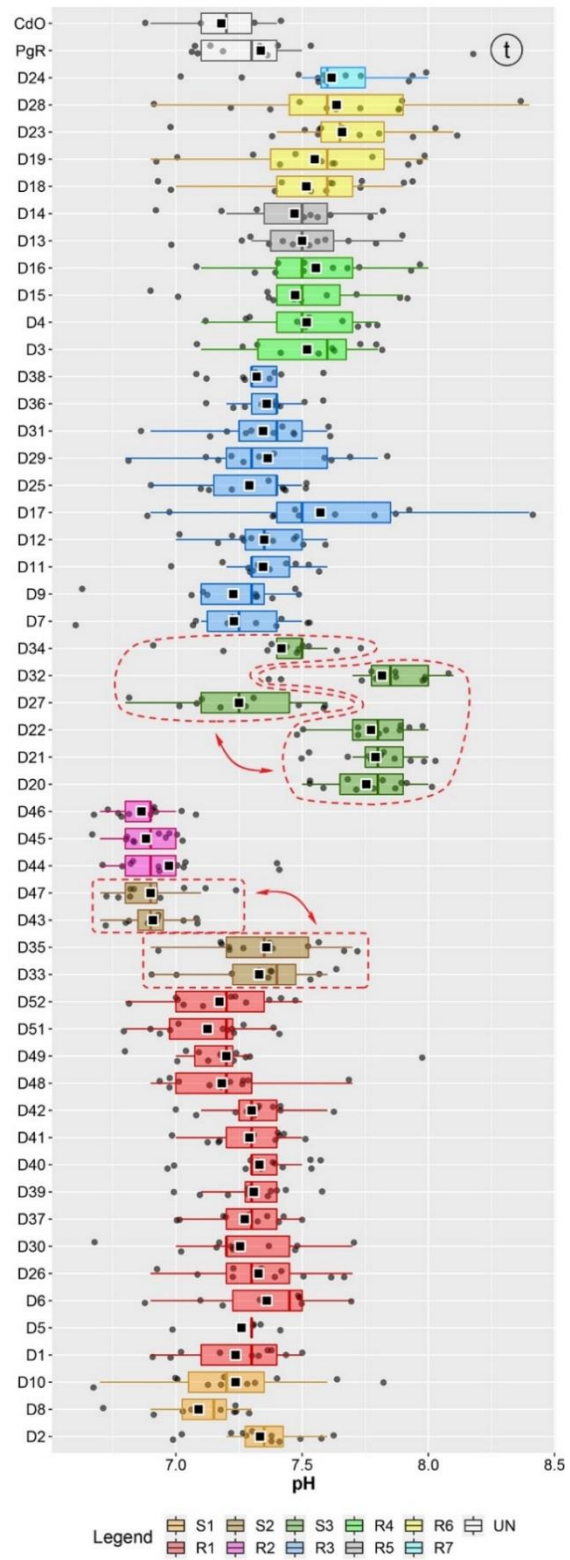

Fig. S4 (continued)

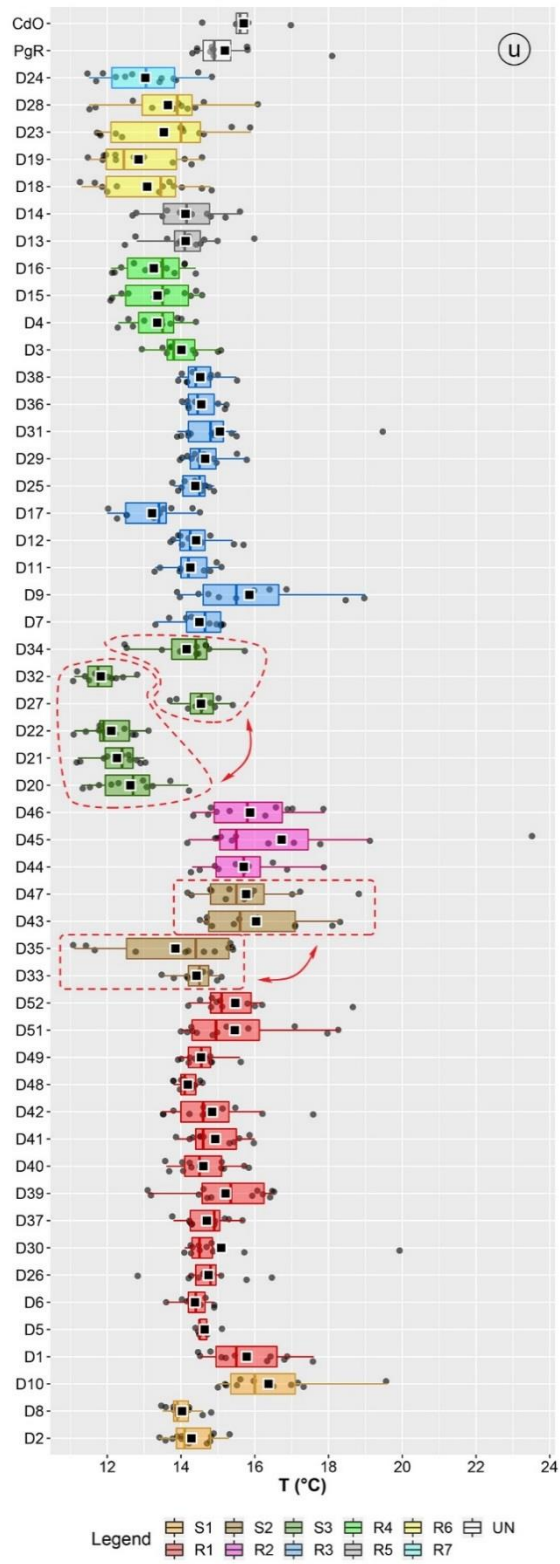

Fig. S4 (continued)

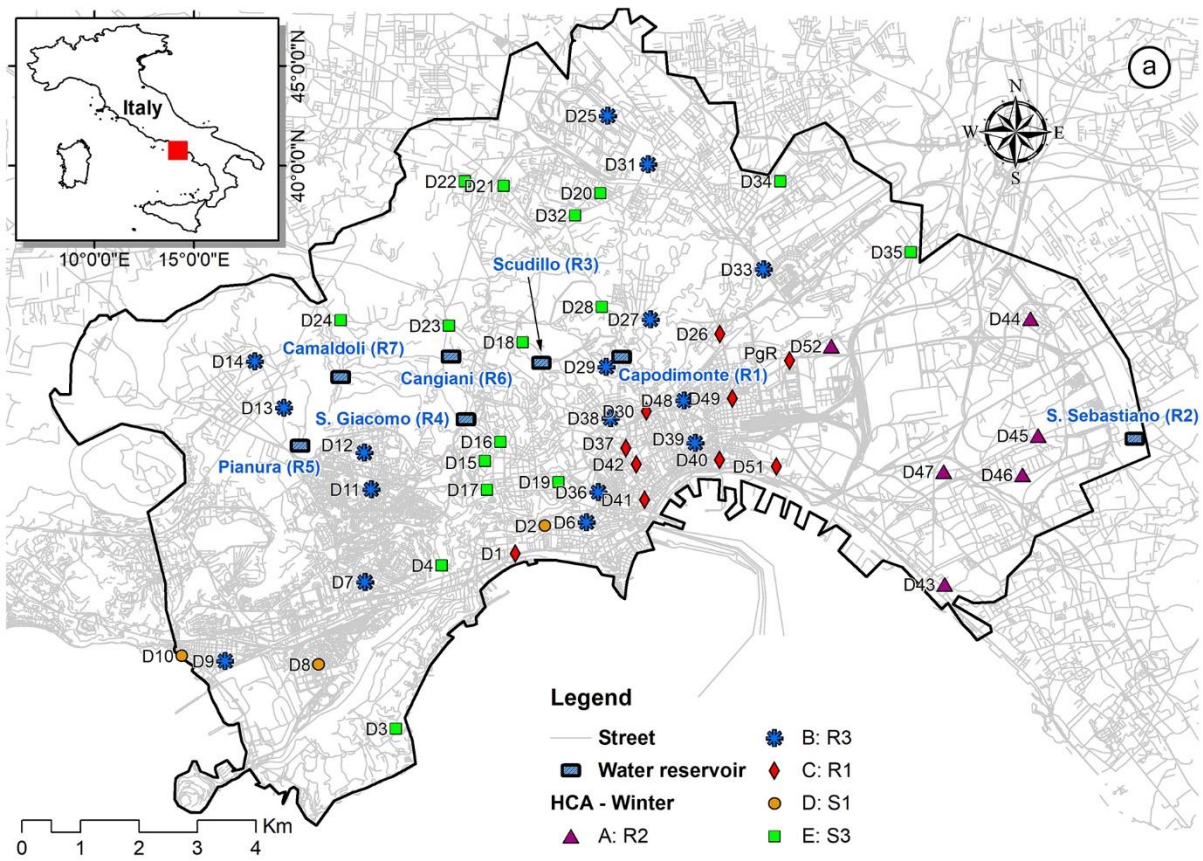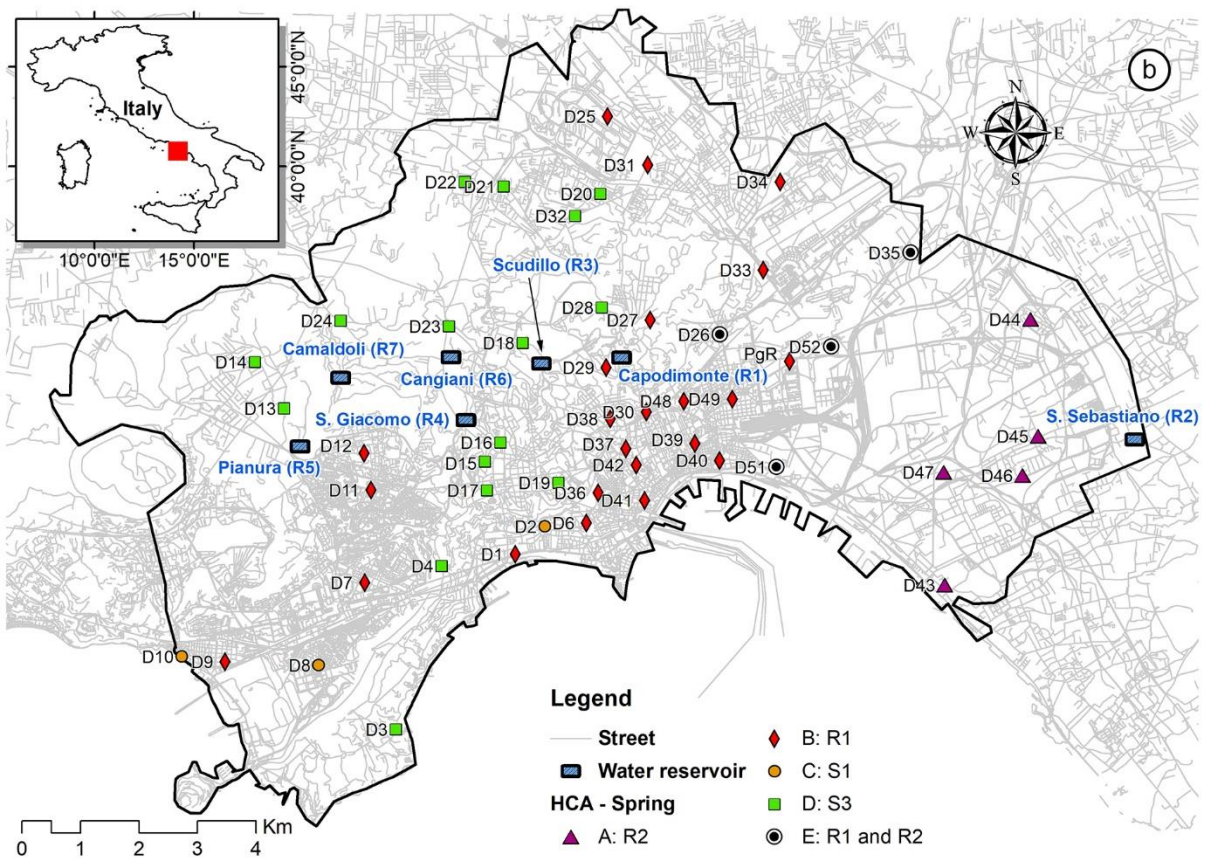

**Fig. S5** Spatial representation of the results of seasonal hierarchical cluster analysis: (a) winter; (b) spring; (c) summer; and (d) fall. R1: Capodimonte; R2: S. Sebastiano; R3: Scudillo; S1: ACO; and S3: Serino Aqueduct.

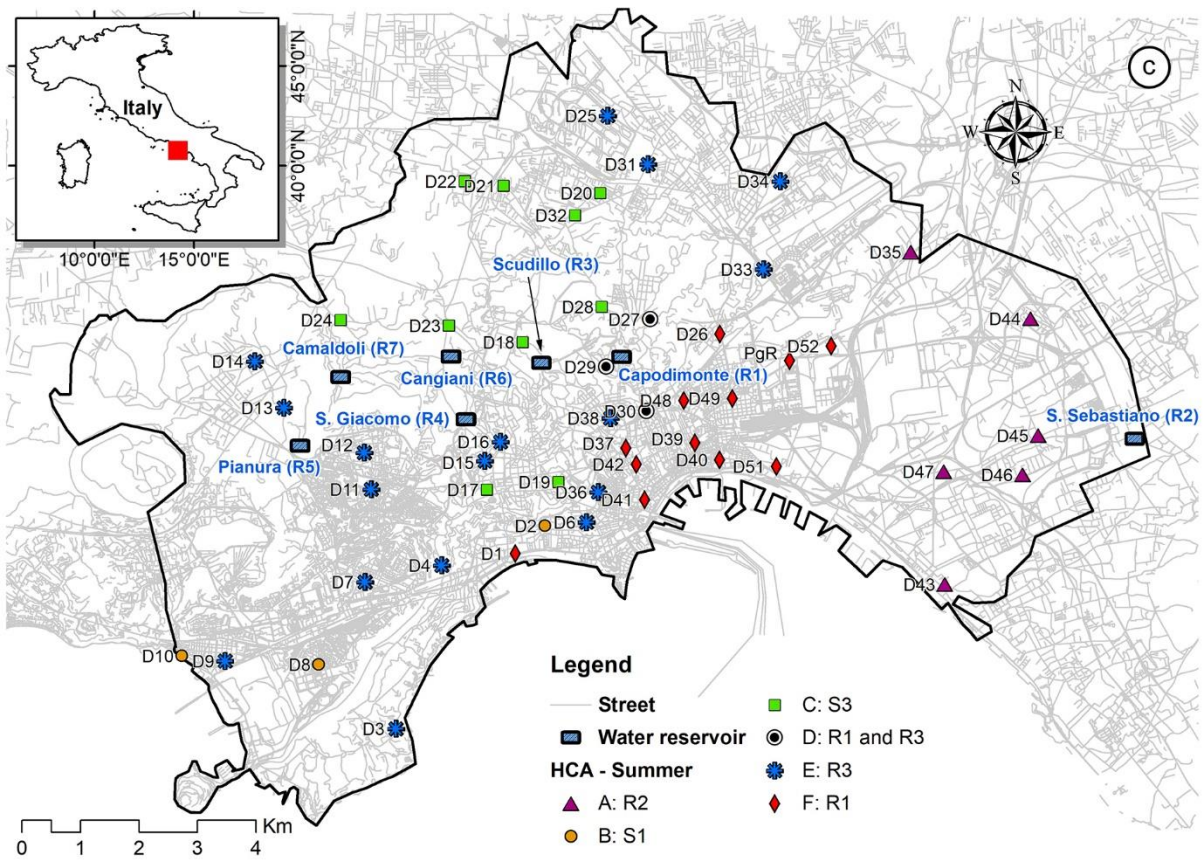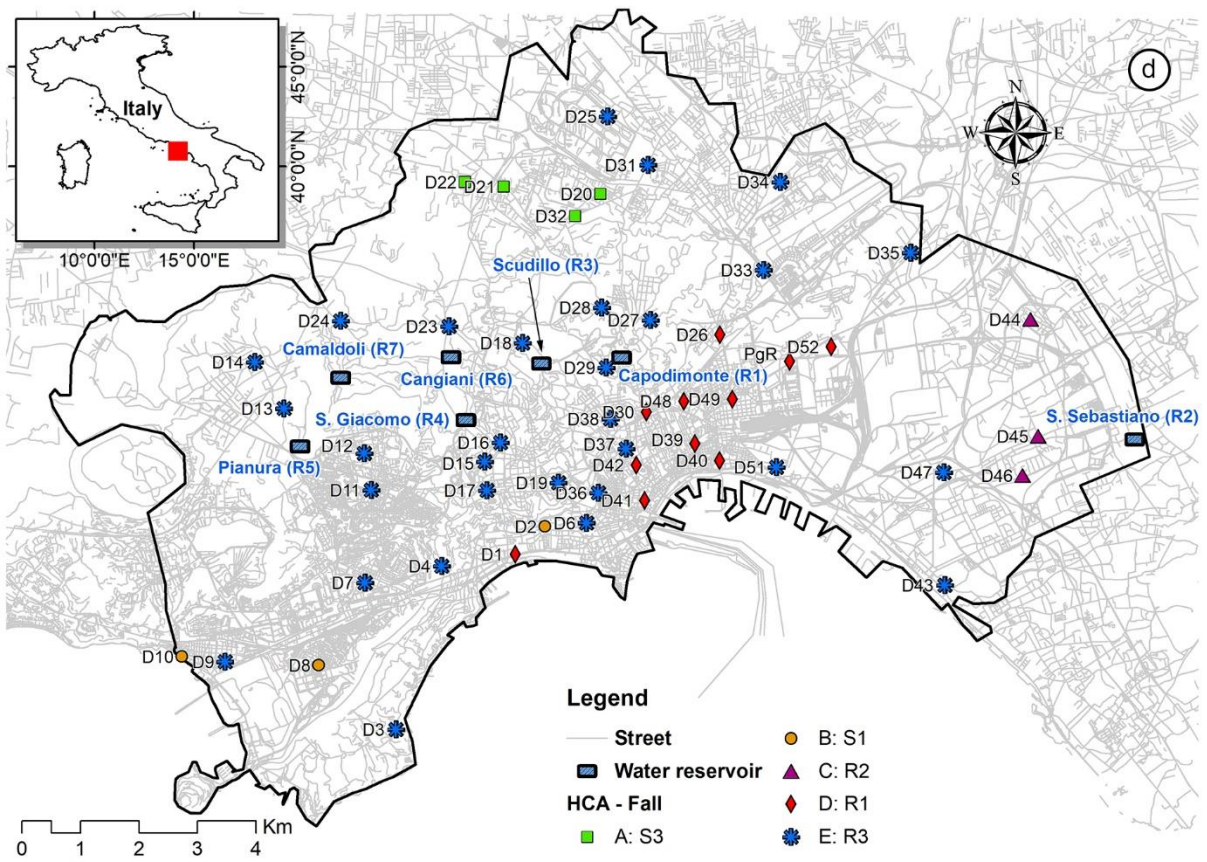

Fig. S5 (continued)

### Text S1 HCA performance

According to the results and discussion in the manuscript, the following aspects are considered to evaluate performance of HCA combined with clr-transformation: 1) D6, D51 and D52 are excluded from R1, 2) D17 and D29 are excluded from R3, and D6 and D33 are included in R3, 3) D33 and D35 are excluded from S2, and 4) D27 and D34 are excluded from S3. Average  $\text{Ca}^{2+}$ ,  $\text{Mg}^{2+}$ ,  $\text{Na}^+$ ,  $\text{Cl}^-$ ,  $\text{SO}_4^{2-}$ ,  $\text{NO}_3^-$  and  $\text{F}^-$  contents are then compared in the samples before and after (without and with asterisk, respectively, in Fig. S6) implementing the above-mentioned modifications. Figs. S6a and b show that the change in average chemical compositions of R1 and R3 is not clear. Hence, chemistry of the input waters is not represented for simplification. However, concentration of ions significantly increased in S2 after excluding D33 and D35. It is obvious that S2\* is comparable with I3 and I4 indicating the highest contribution of these input waters and negligible importance of I5 in the period of this investigation (Fig. S6c). S3 is also plotted on I5 when D27 and D34 are ignored (Fig. S6d). Consequently, combination of HCA and clr-transformation works effectively with different sample sizes; however, capability of the approach can visually be verified when there are few samples.

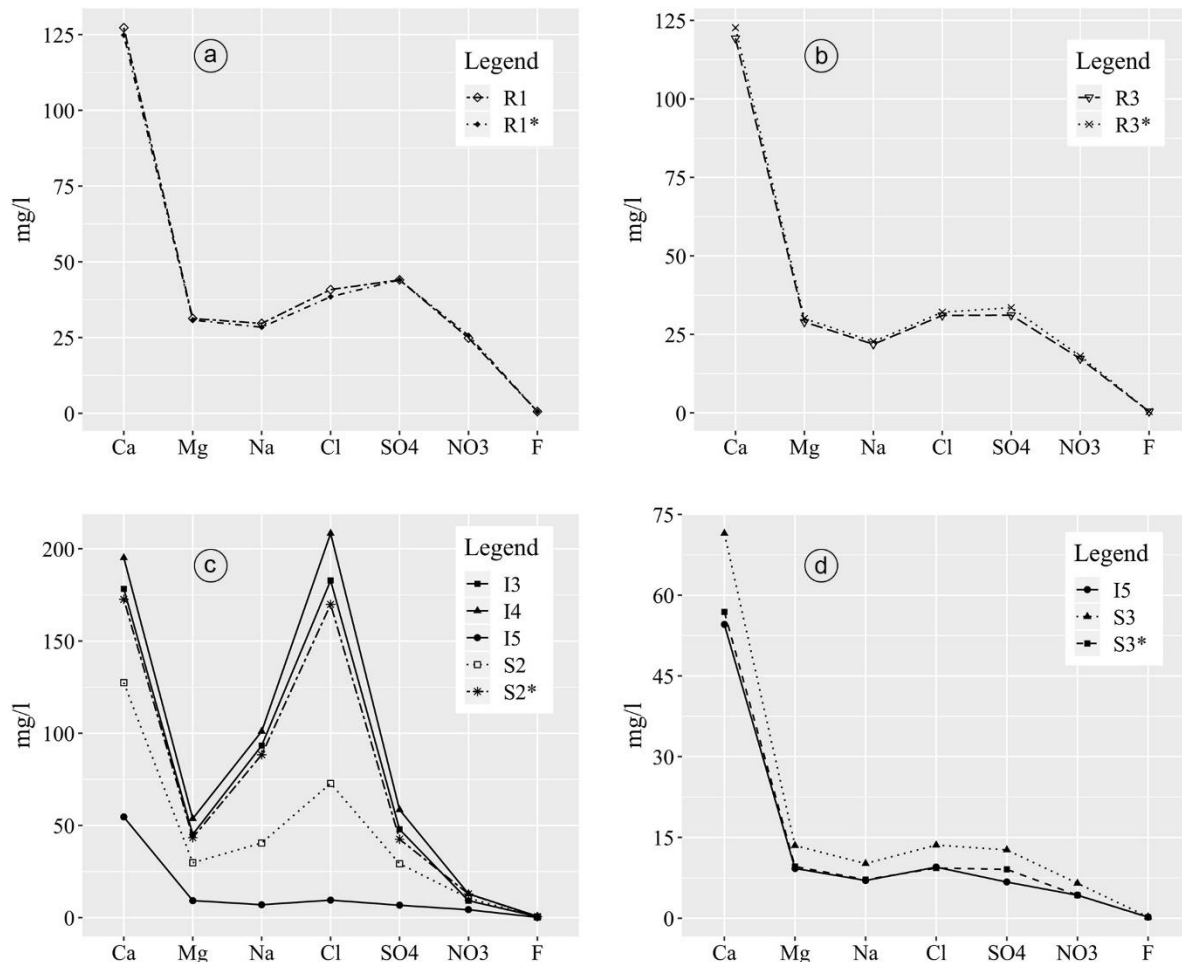

**Fig. S6** The tap water composition before and after (without and with asterisk, respectively) implementing the HCA result: (a) R1: Capodimonte; (b) R3: Scudillo; (c) S2: Canello well field, Campano Aqueduct and Ponte Tavano wells, I3: Canello well field, I4: Campano Aqueduct and Ponte Tavano wells, and I5: Serino Aqueduct; and (d) S3: Serino Aqueduct.
